# Supplementary material for: Competing electrophilic substitution and oxidative polymerization of arylamines with selenium dioxide
Source: publisher site journal article supplement (doi:10.3762/bjoc.20.105), 2024-05-27
Supplement: Additional file 1 [file 1860-5397-20-105-S1.pdf]

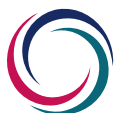

## Supporting Information

for

### Competing electrophilic substitution and oxidative polymerization of arylamines with selenium dioxide

Vishnu Selladurai and Selvakumar Karuthapandi

*Beilstein J. Org. Chem.* **2024**, *20*, 1221–1235. [doi:10.3762/bjoc.20.105](https://doi.org/10.3762/bjoc.20.105)

**Spectroscopic characterization of products ( $^1\text{H}$ ,  $^{13}\text{C}$  and  $^{77}\text{Se}$  NMR, IR, and HRMS spectra), packing arrangements of compounds and HOMO and LUMO energy values for reactants**

|    | Content                                                                                                            | page |
|----|--------------------------------------------------------------------------------------------------------------------|------|
| 1. | Spectroscopic characterization of polymers 1–3                                                                     | S3   |
|    | UV–vis spectrum for polymers 1–3                                                                                   | S3   |
|    | FTIR spectrum for polymers 1–3                                                                                     | S4   |
| 2. | Spectrometric characterization of products obtained from the reaction of aniline with SeO <sub>2</sub>             | S5   |
|    | FTIR spectrum for mixture of compounds <b>1</b> and <b>2</b>                                                       | S5   |
|    | HRMS–ESI spectrum for mixture of compounds <b>1</b> and <b>2</b>                                                   | S6   |
|    | <sup>77</sup> Se NMR spectral studies for mixture of compounds <b>1</b> and <b>2</b>                               | S7   |
|    | FTIR spectrum for compound <b>3</b>                                                                                | S8   |
|    | HRMS–ESI spectrum for compound <b>3</b>                                                                            | S9   |
|    | <sup>1</sup> H NMR spectral studies for compound <b>3</b>                                                          | S10  |
| 3. | Spectrometric characterization of products obtained from the reaction of <i>o</i> -anisidine with SeO <sub>2</sub> | S11  |
|    | FTIR spectrum for mixture of compounds <b>4–8</b>                                                                  | S11  |
|    | HRMS–ESI spectrum for mixture of compounds <b>4–8</b>                                                              | S12  |
|    | <sup>77</sup> Se NMR spectral studies for mixture of compounds <b>4–8</b>                                          | S13  |
|    | FTIR spectrum for compound <b>9</b>                                                                                | S14  |
|    | HRMS–ESI spectrum for compound <b>9</b>                                                                            | S15  |
|    | <sup>1</sup> H NMR spectral studies for compound <b>9</b>                                                          | S16  |
|    | <sup>13</sup> C NMR spectral studies for compound <b>9</b>                                                         | S17  |
|    | FTIR spectrum for compound <b>10</b>                                                                               | S18  |
|    | HRMS–ESI spectrum for compound <b>10</b>                                                                           | S19  |
|    | <sup>1</sup> H NMR spectral studies for compound <b>10</b>                                                         | S20  |
|    | <sup>13</sup> C NMR spectral studies for compound <b>10</b>                                                        | S21  |
| 4. | Spectrometric characterization of products obtained from the reaction of methyl anthranilate with SeO <sub>2</sub> | S22  |
|    | FTIR spectrum for compound <b>11</b>                                                                               | S22  |
|    | HRMS–ESI spectrum for compound <b>11</b>                                                                           | S23  |
|    | <sup>1</sup> H NMR spectral studies for compound <b>11</b>                                                         | S24  |
|    | <sup>13</sup> C NMR spectral studies for compound <b>11</b>                                                        | S25  |
|    | <sup>77</sup> Se NMR spectral studies for compound <b>11</b>                                                       | S26  |
|    | FTIR spectrum for compound <b>12</b>                                                                               | S27  |
|    | HRMS–ESI spectrum for compound <b>12</b>                                                                           | S28  |
|    | <sup>1</sup> H NMR spectral studies for compound <b>12</b>                                                         | S29  |
|    | <sup>13</sup> C NMR spectral studies for compound <b>12</b>                                                        | S30  |
|    | <sup>77</sup> Se NMR spectral studies for compound <b>12</b>                                                       | S31  |
|    | FTIR spectrum for compound <b>13</b>                                                                               | S32  |
|    | HRMS–ESI spectrum for compound <b>13</b>                                                                           | S33  |
|    | <sup>1</sup> H NMR spectral studies for compound <b>13</b>                                                         | S34  |
|    | <sup>13</sup> C NMR spectral studies for compound <b>13</b>                                                        | S35  |

|     |                                                                                       |     |
|-----|---------------------------------------------------------------------------------------|-----|
| 5.  | Relative color change upon addition of SeO <sub>2</sub> to arylamines in acetonitrile | S36 |
|     | Photo images of reaction vessels                                                      | S36 |
| 6.  | Packing arrangement for compounds <b>3</b> and <b>9</b>                               | S37 |
| 7.  | Packing arrangement for compounds <b>13</b> and <b>10</b>                             | S38 |
| 8.  | Packing arrangement for compound <b>11</b>                                            | S39 |
| 9.  | Packing arrangement for compound <b>12</b>                                            | S40 |
| 10. | HOMO and LUMO energy values for reactants                                             | S41 |

1. Spectroscopic characterization of polymers 1–3

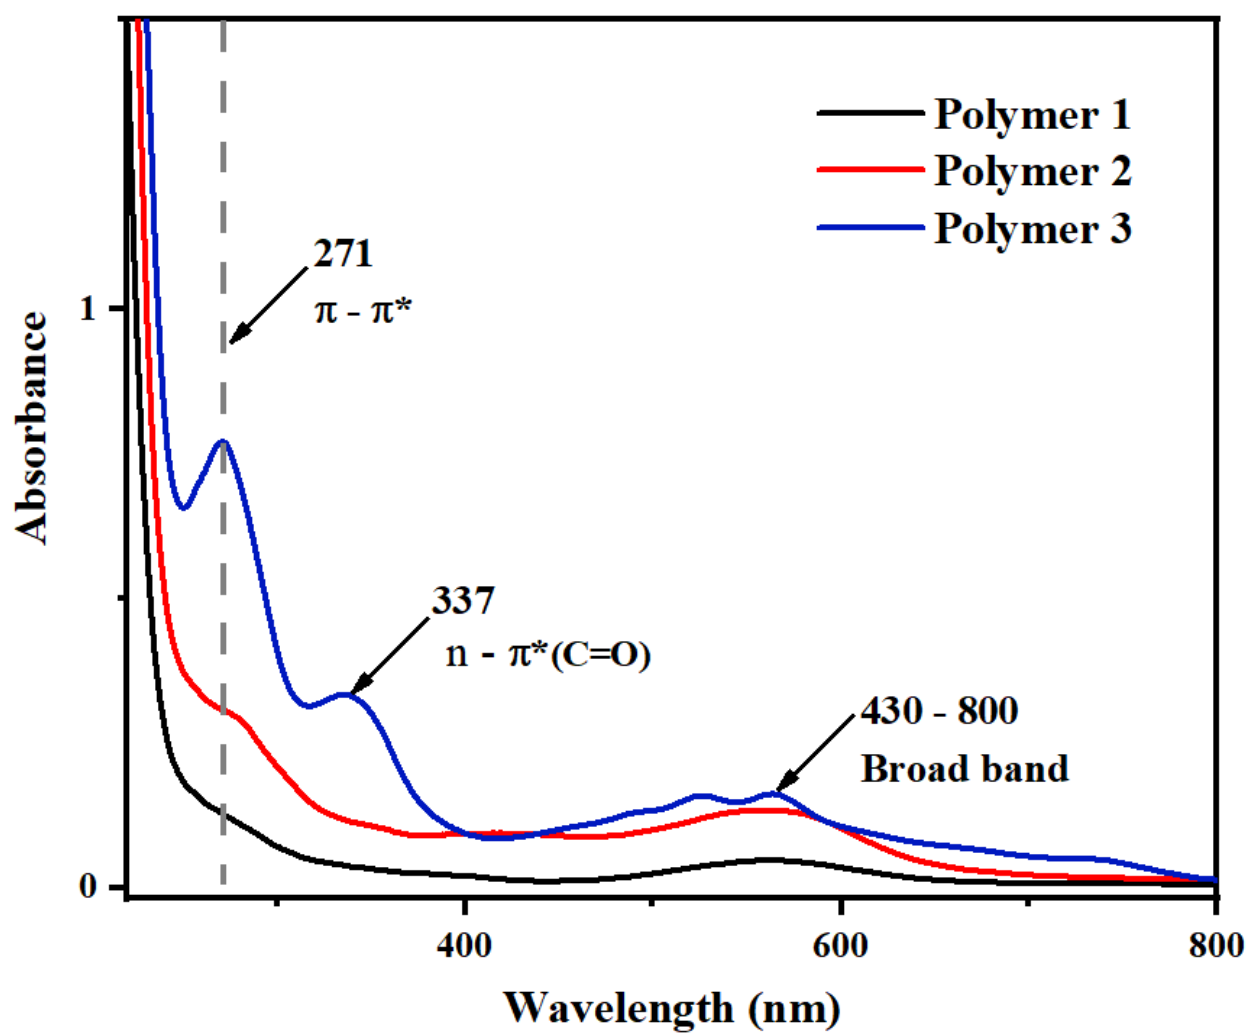

Figure S1. UV-vis spectrum for polymers 1–3.

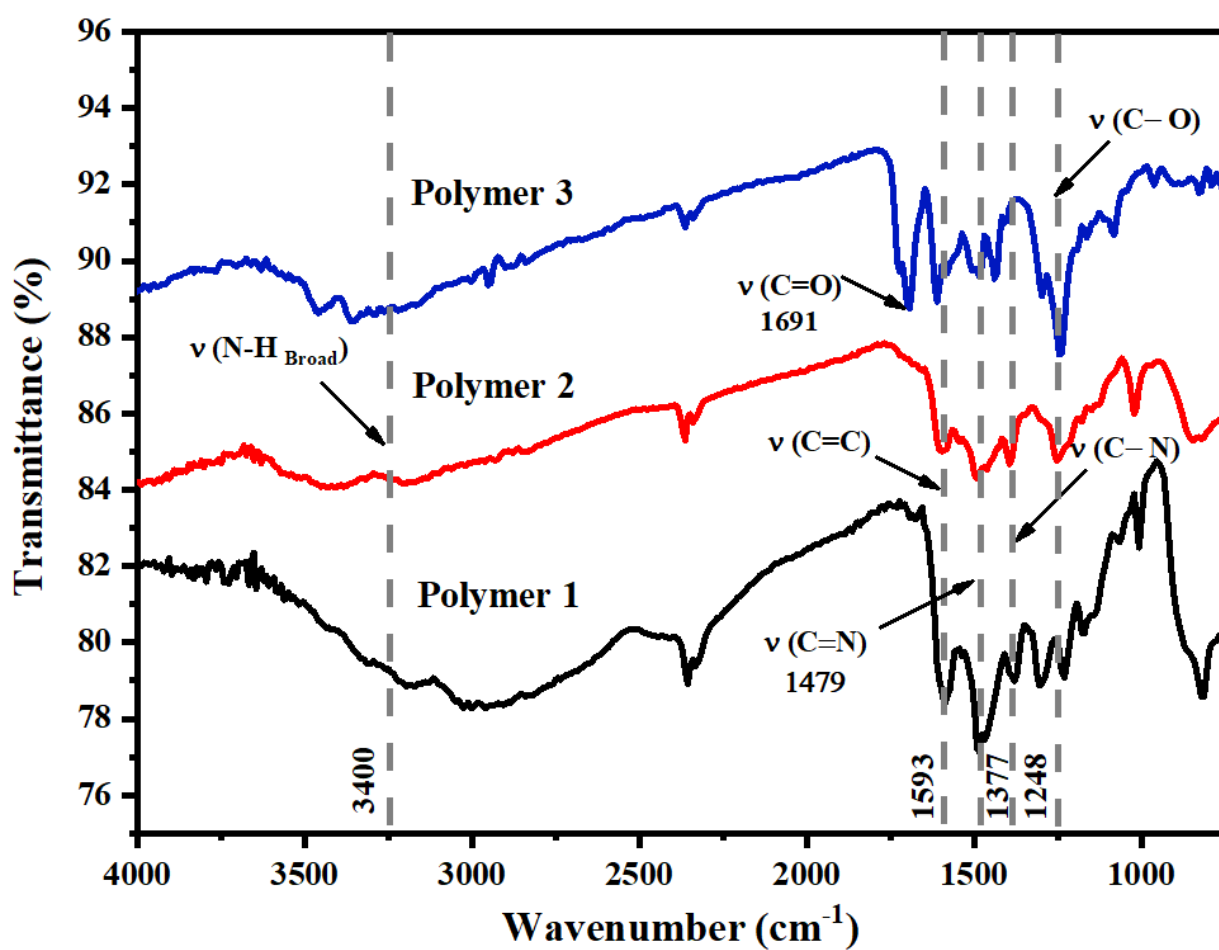

Figure S2. FTIR (KBr) spectrum for polymers 1–3.

## 2. Spectrometric characterization of products obtained for the reaction of aniline with $\text{SeO}_2$

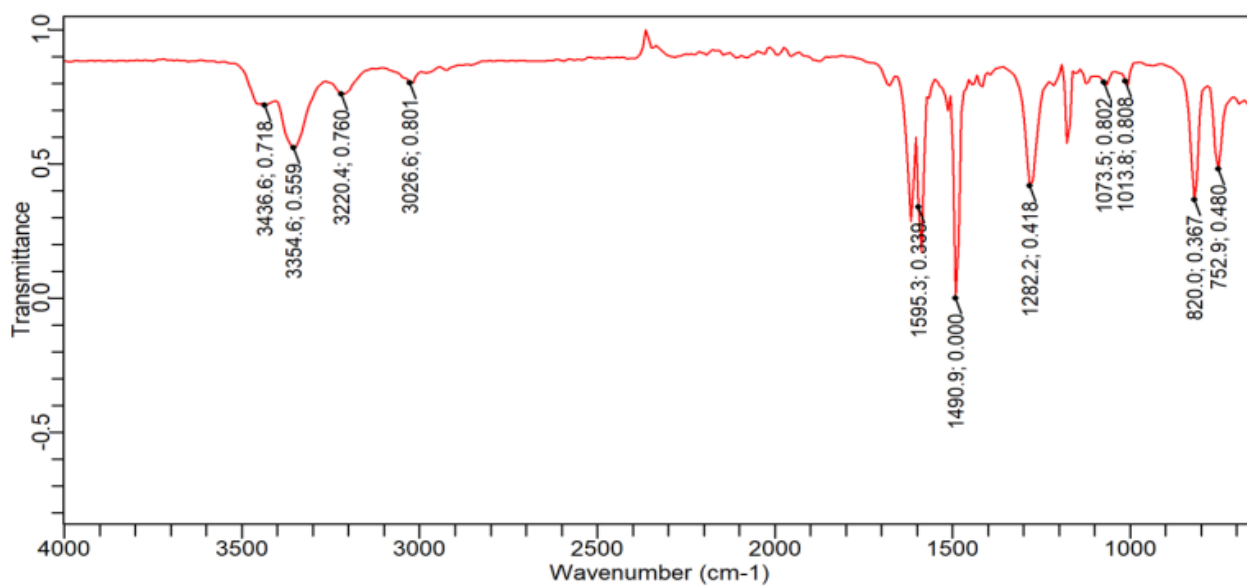

**Figure S3.** FTIR(KBr) spectrum for mixture of compounds **1** and **2**.

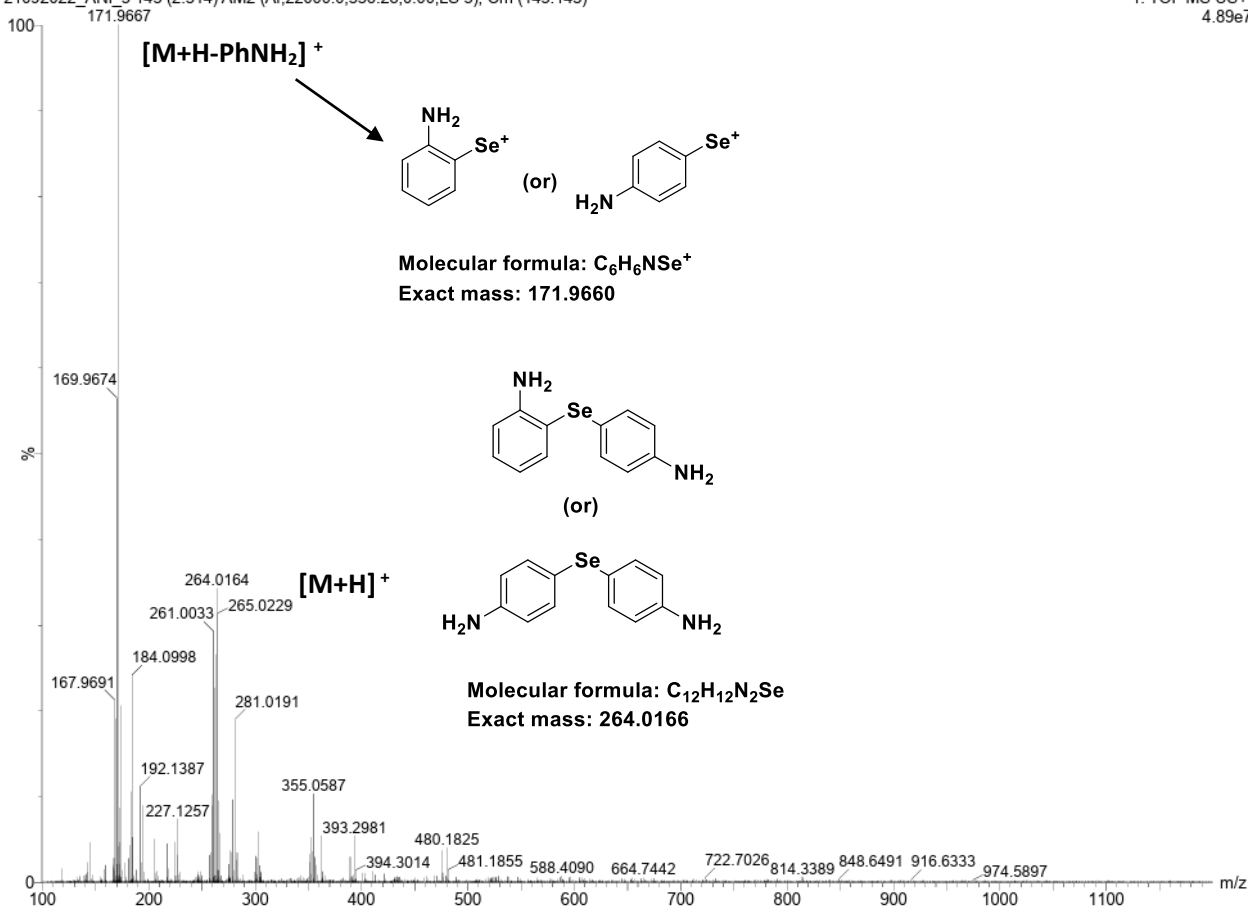

**Figure S4.** HRMS-ESI spectrum for mixture of compounds **1** and **2**.

EXT-VITAP-SV-ANI-4(500MHz).1.fid  
EXT-VITAP-SV-ANI-4(500MHz)

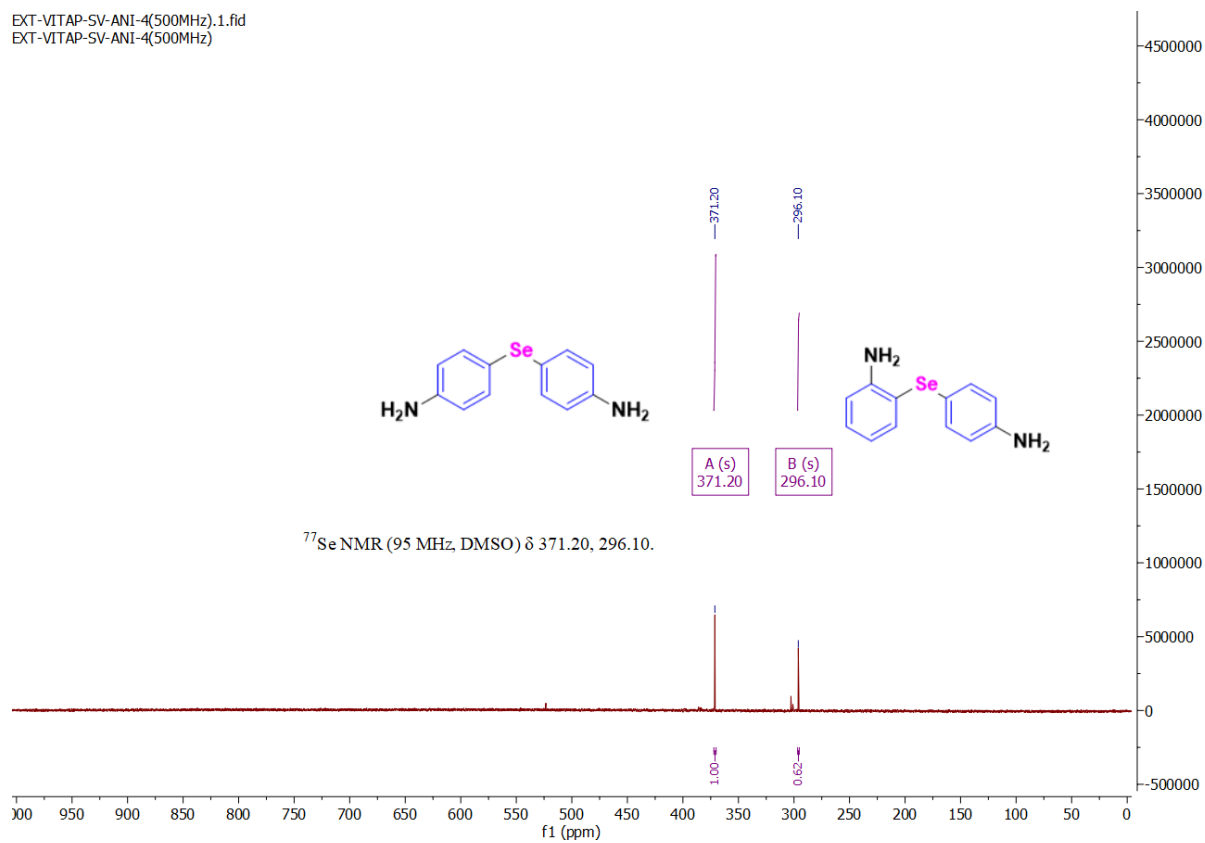

**Figure S5.**  $^{77}\text{Se}$  NMR spectral studies for mixture of compounds **1** and **2**.



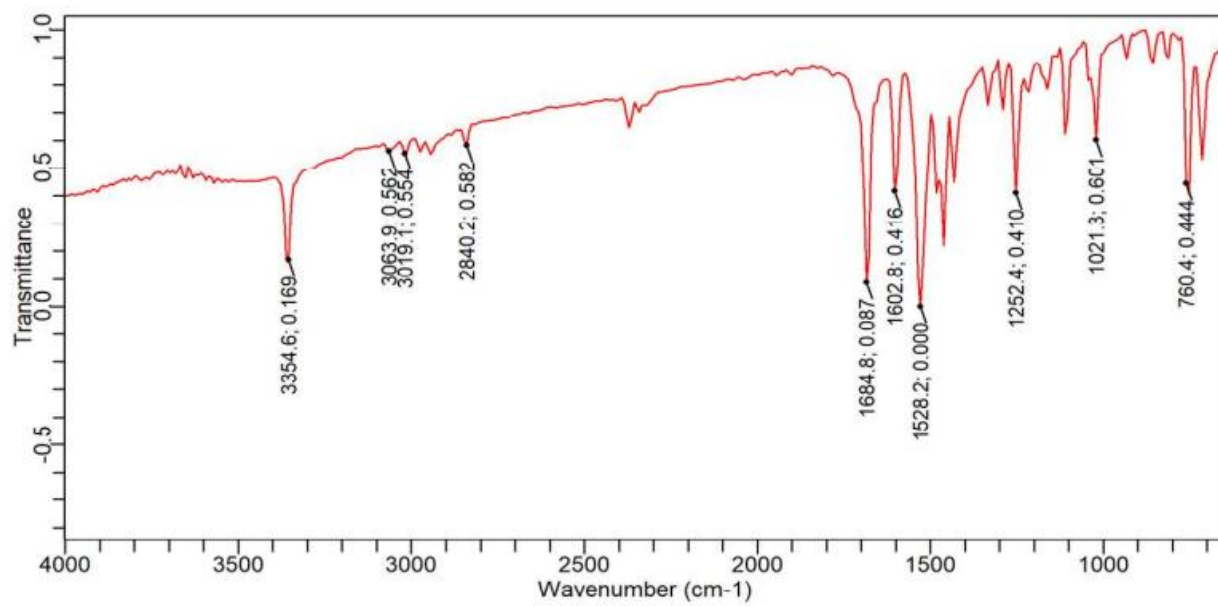

**Figure S6.** FTIR (KBr) spectrum for compound 3.

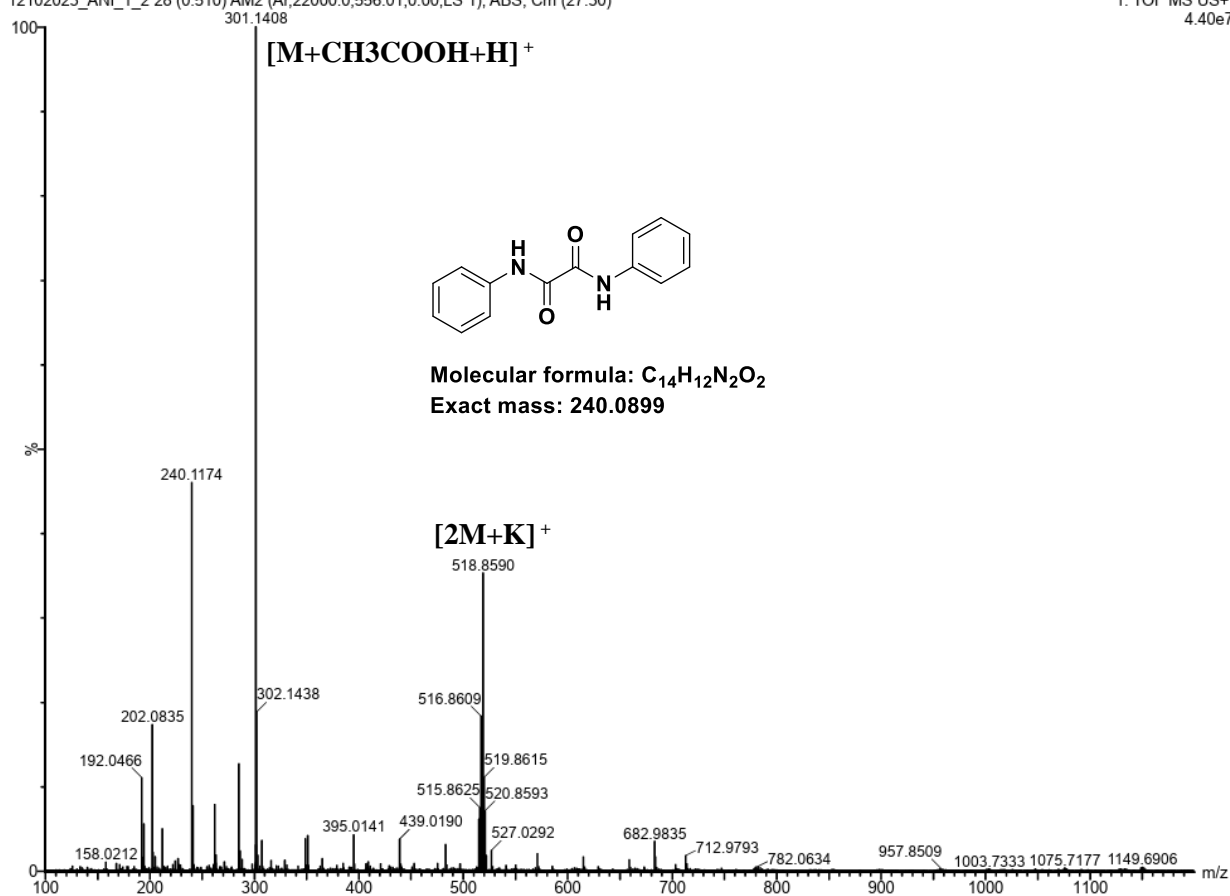

**Figure S7.** HRMS–ESI spectrum for compound **3**.

EXT-VITAP-SV-ANI-1(500MHz).1.fid  
EXT-VITAP-SV-ANI-1(500MHz)  
PROTON CDCl3 {/opt/topspin/Ext Samples} nmrsu 15

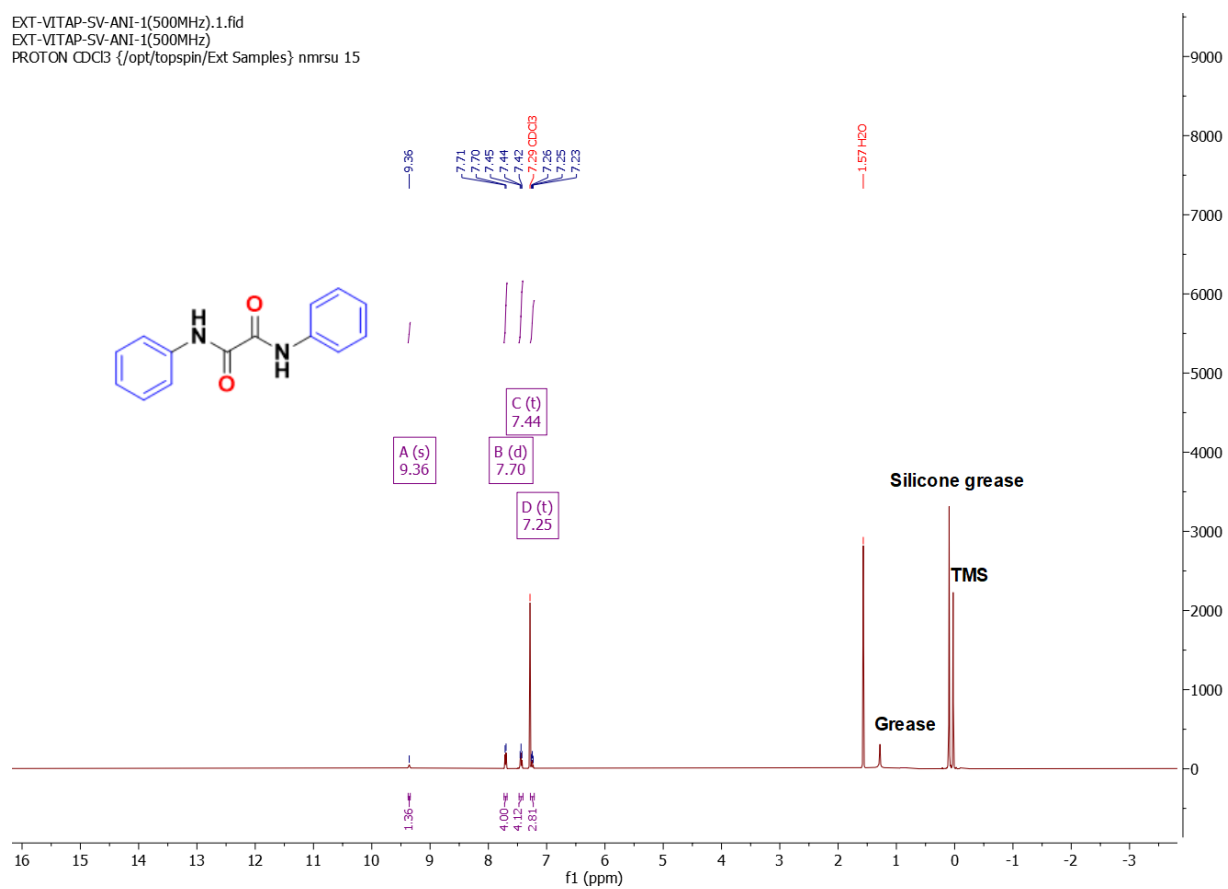

Figure S8. <sup>1</sup>H NMR spectral studies for compound 3.

### 3. Spectrometric characterization of products obtained from the reaction of *o*-anisidine with SeO<sub>2</sub>

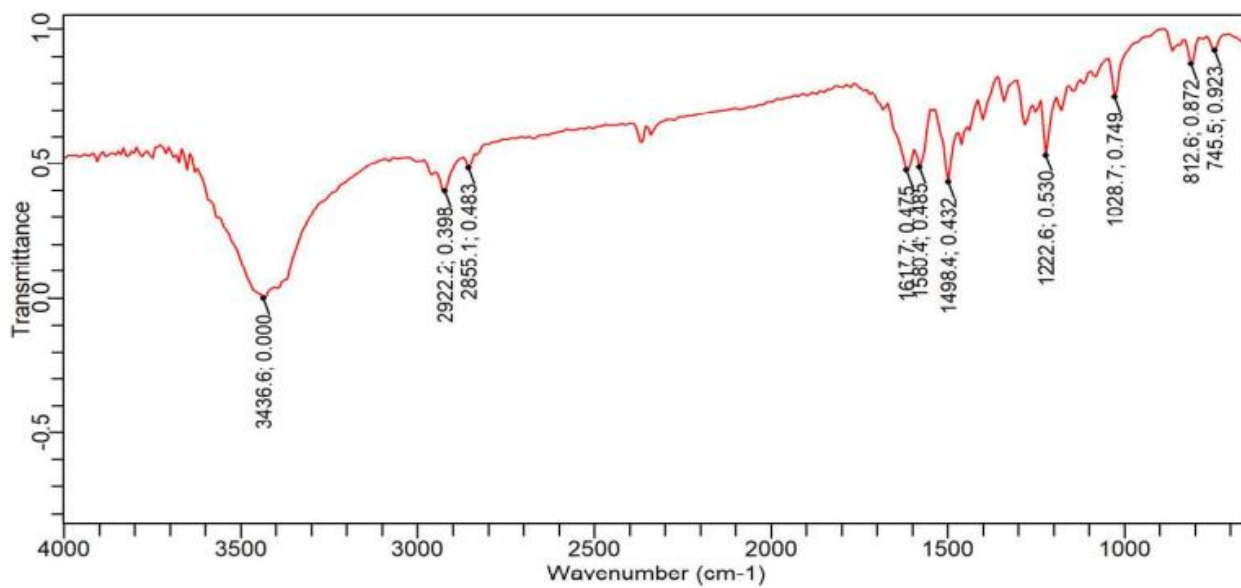

**Figure S9.** FTIR(KBr) spectrum for mixture of compounds 4-8.

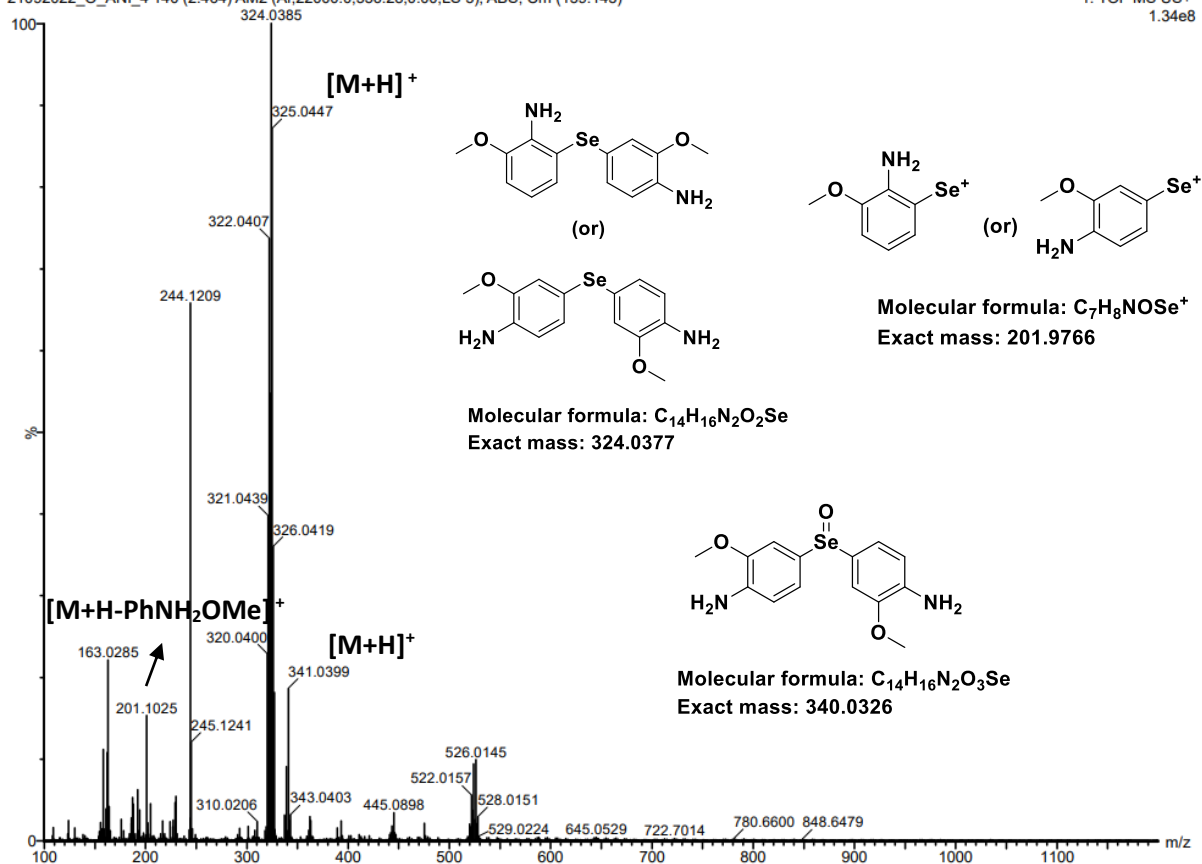

**Figure S10.** HRMS-ESI spectrum for mixture of compounds 4-8.

EXT-VITAP-SV-O-ANI-4(500MHz).3.fid  
EXT-VITAP-SV-O-ANI-4(500MHz)  
SE77ZG CDCl3 {/opt/topspin/Ext Samples} nmrsu 3

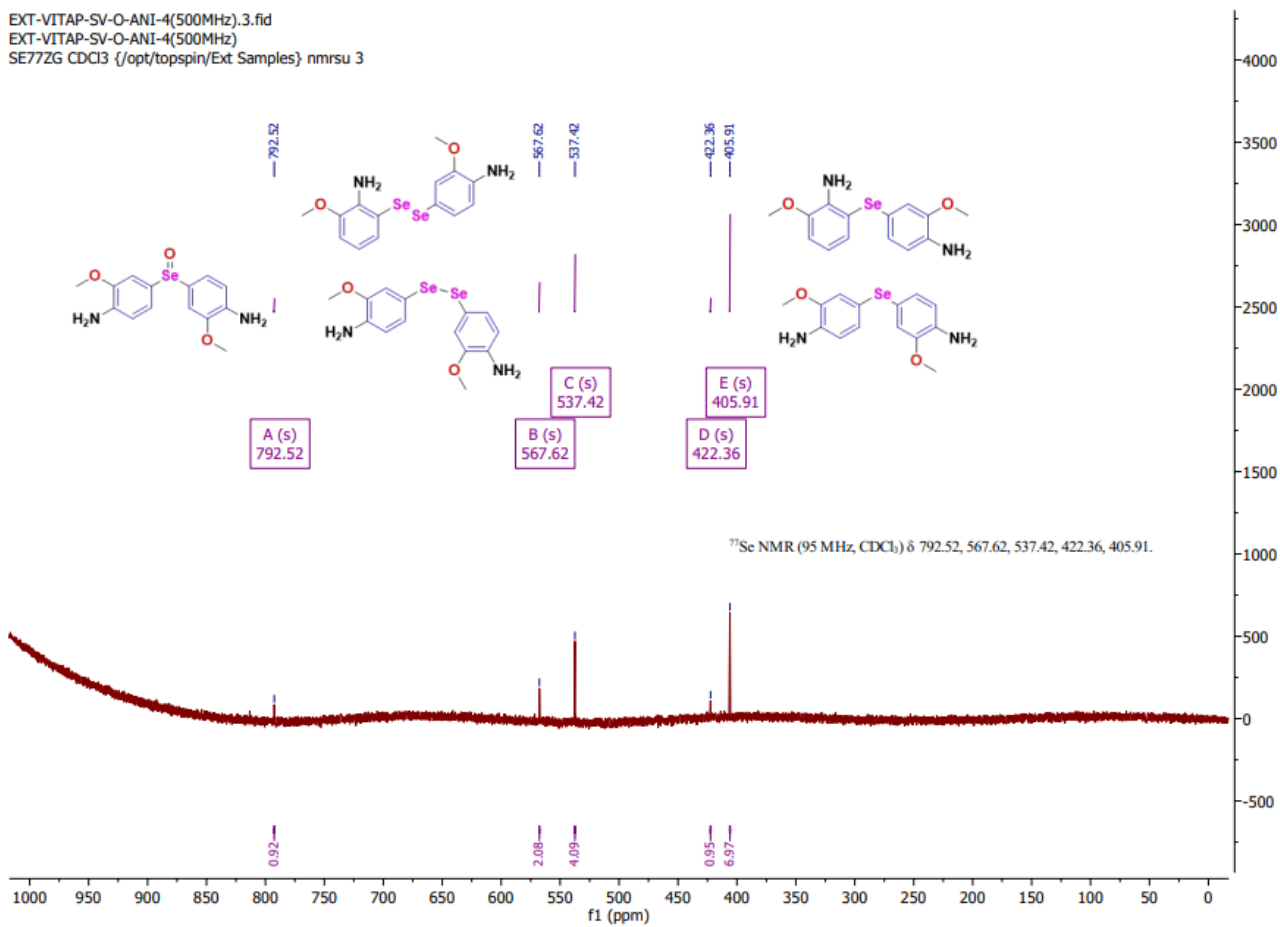

**Figure S11.** <sup>77</sup>Se NMR spectral studies for mixture of compounds 4–8.

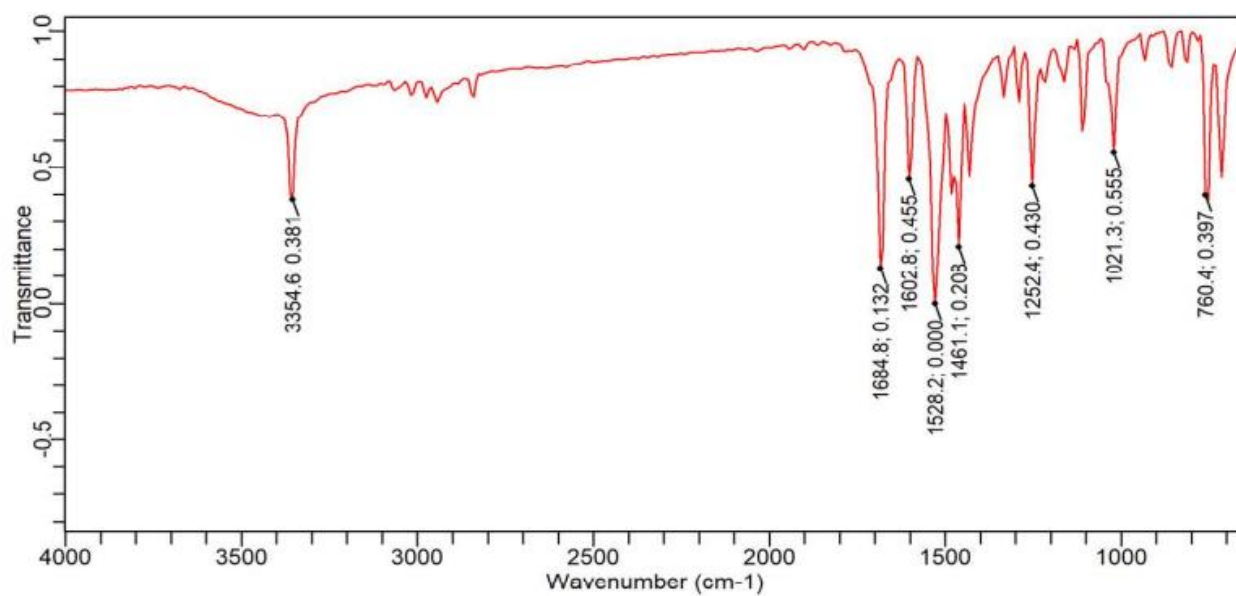

**Figure S12.** FTIR(KBr) spectrum for compound **9**.

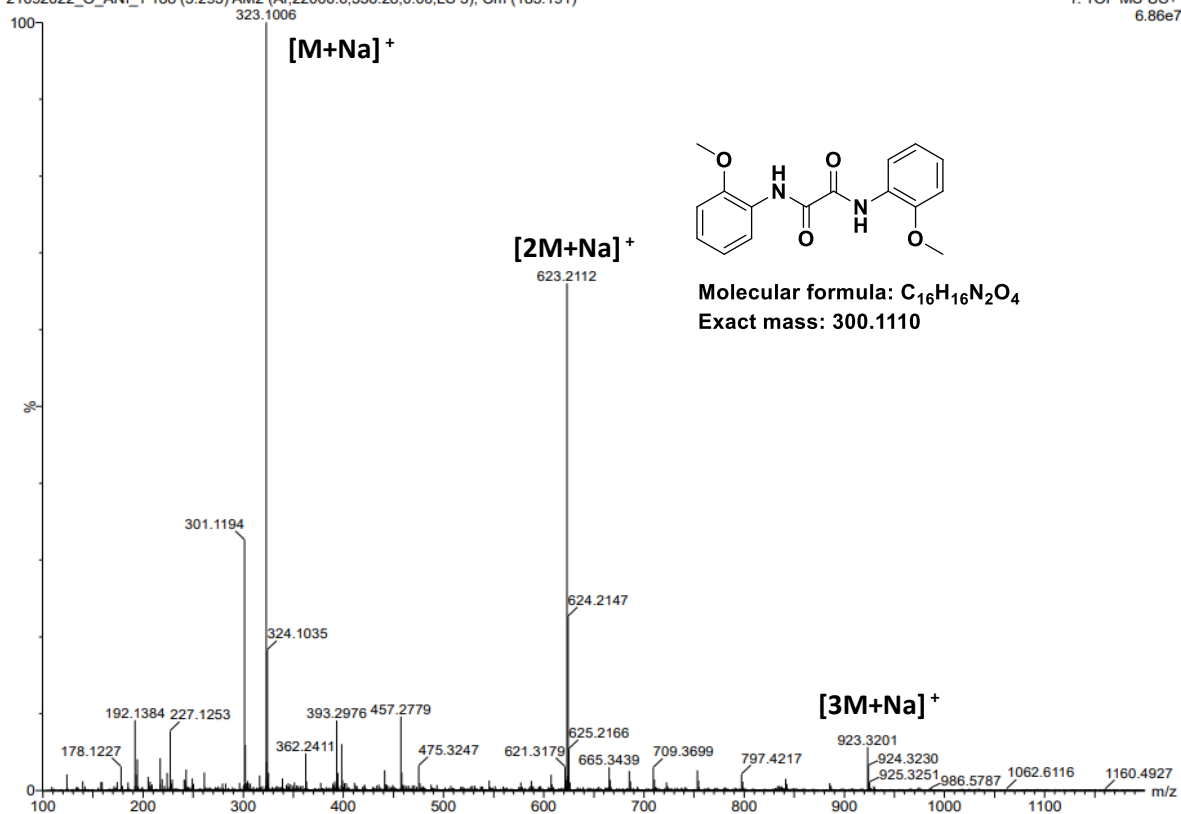

**Figure S13.** HRMS–ESI spectrum for compound **9**.



EXT-VITAP-SV-O-ANI-1(500MHz).1.fid  
EXT-VITAP-SV-O-ANI-1(500MHz)  
PROTON CDCl3 {/opt/topspin/Ext Samples} nmrsu 9

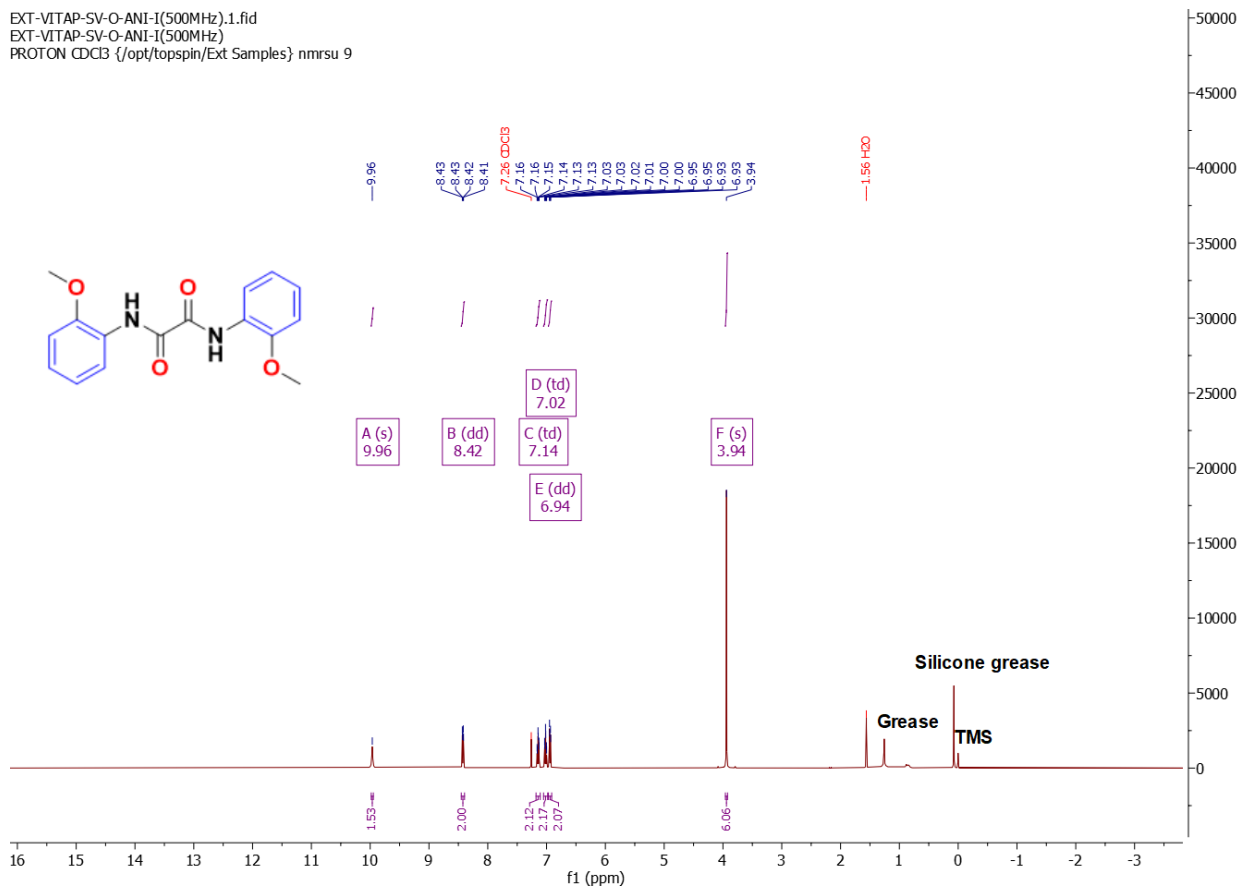

**Figure S14.**  $^1\text{H}$  NMR spectral studies for compound **9**.

EXT-VITAP-SV-O-ANI-1(500MHz).2.fid  
EXT-VITAP-SV-O-ANI-1(500MHz)  
C13CPD CDCl3 {/opt/topspin/Ext Samples} nmrso 9

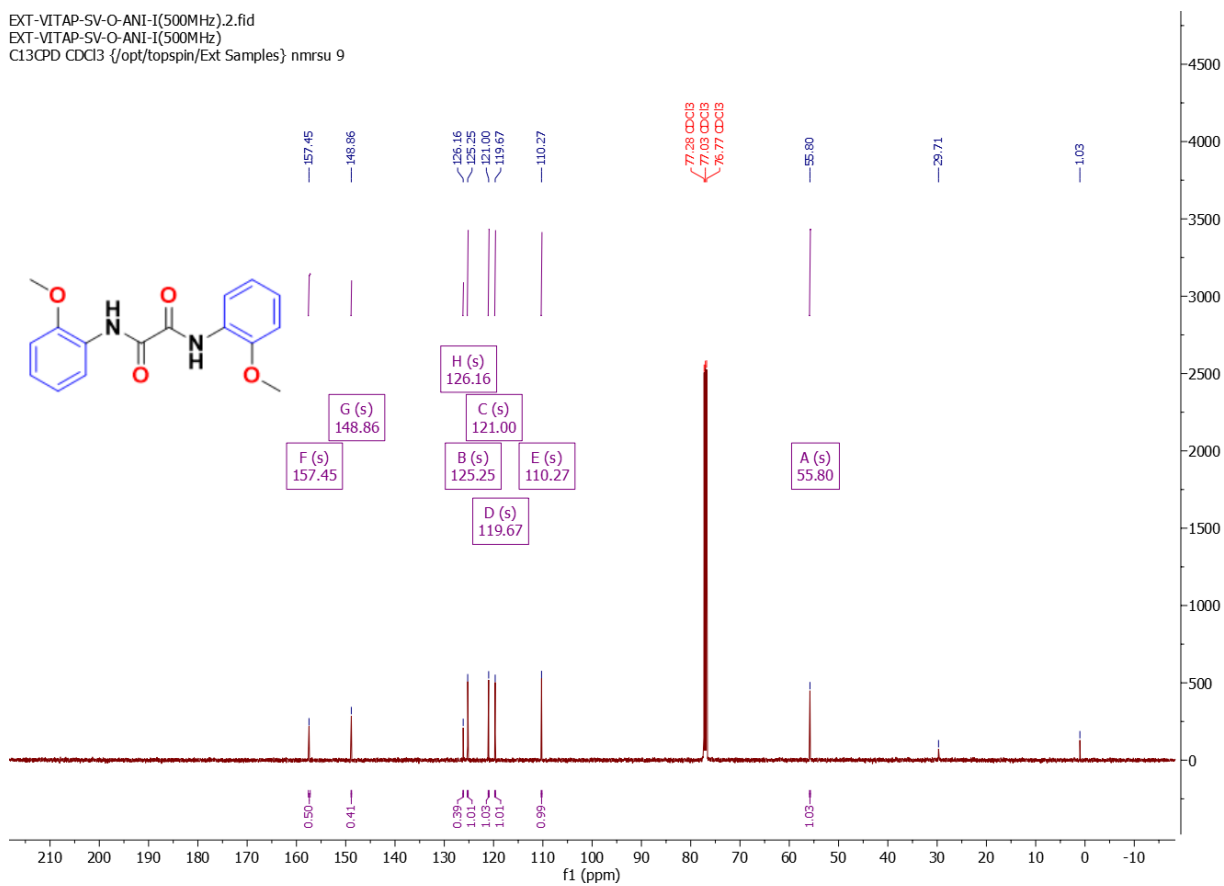

Figure S15. <sup>13</sup>C NMR spectral studies for compound 9.

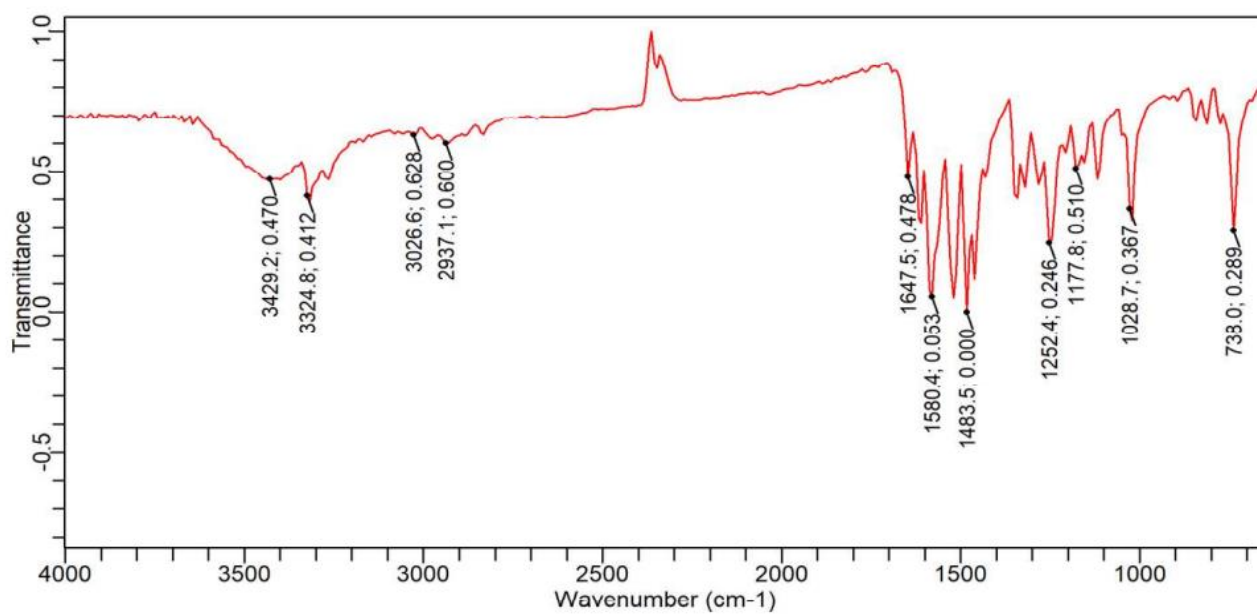

**Figure S16.** FTIR(KBr) spectrum for compound **10**.

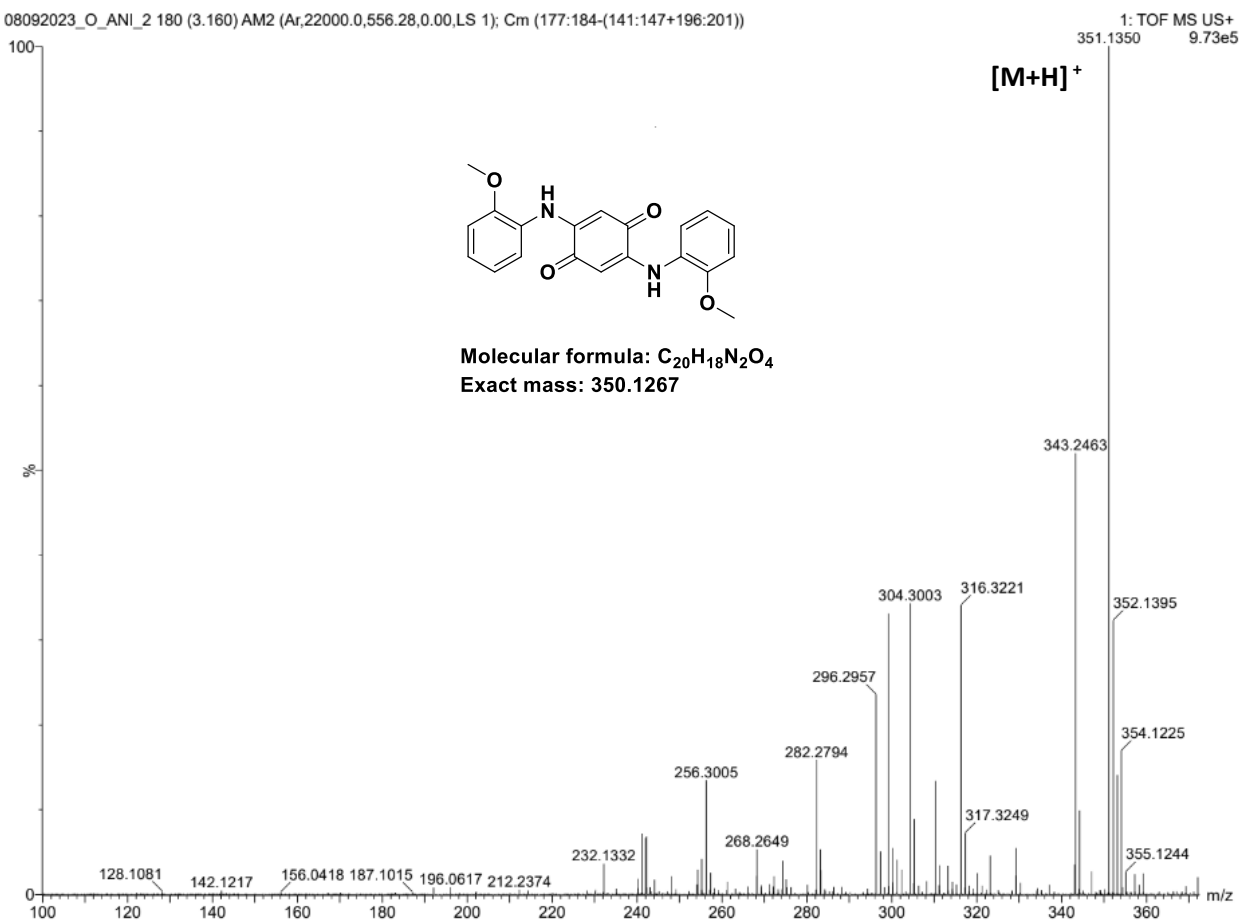

**Figure S17.** HRMS–ESI spectrum for compound **10**.

EXT-VITAP-SV-O-ANI-2(500MHz).1.fid  
EXT-VITAP-SV-O-ANI-2(500MHz)  
PROTON CDCl3 {/opt/topspin/Ext Samples} nmrsu 2

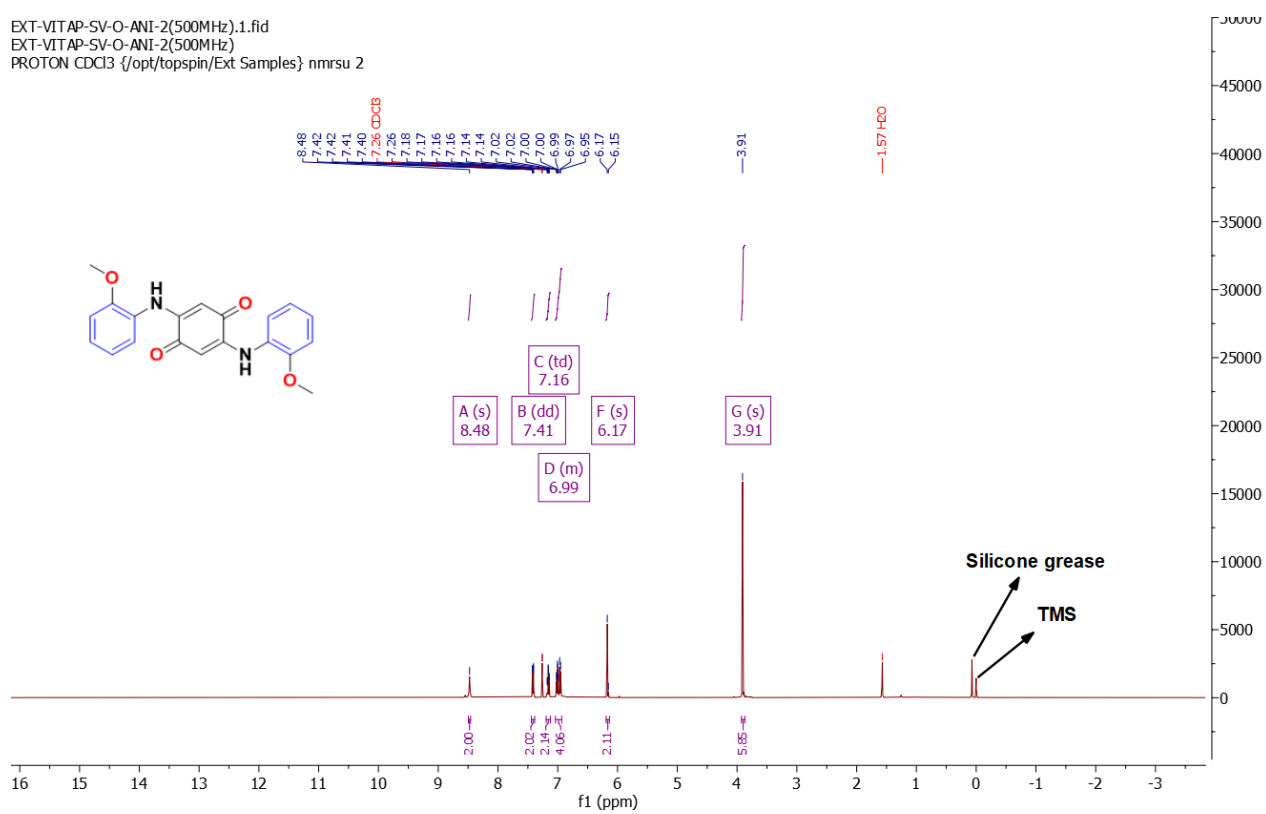

Figure S18. <sup>1</sup>H NMR spectral studies for compound 10,

EXT-VITAP-SV-O-ANI-2(500MHz).2.fid  
EXT-VITAP-SV-O-ANI-2(500MHz)  
C13CPD CDCl3 {/opt/topspin/Ext Samples} nmrsu 2

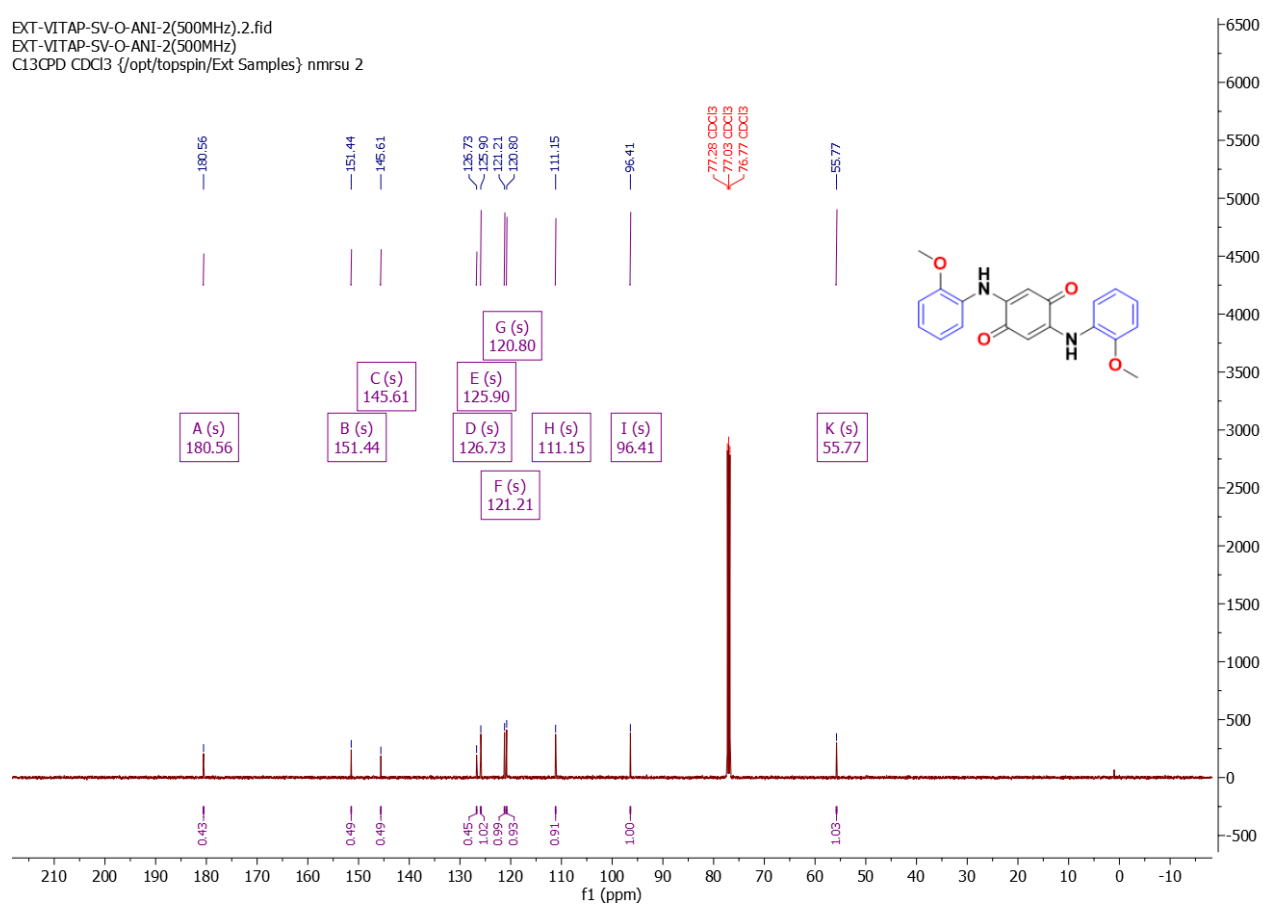

**Figure S19.**  $^{13}\text{C}$  NMR spectral studies for compound 10.

4. Spectrometric characterization of products obtained from the reaction of methyl anthranilate with  $\text{SeO}_2$

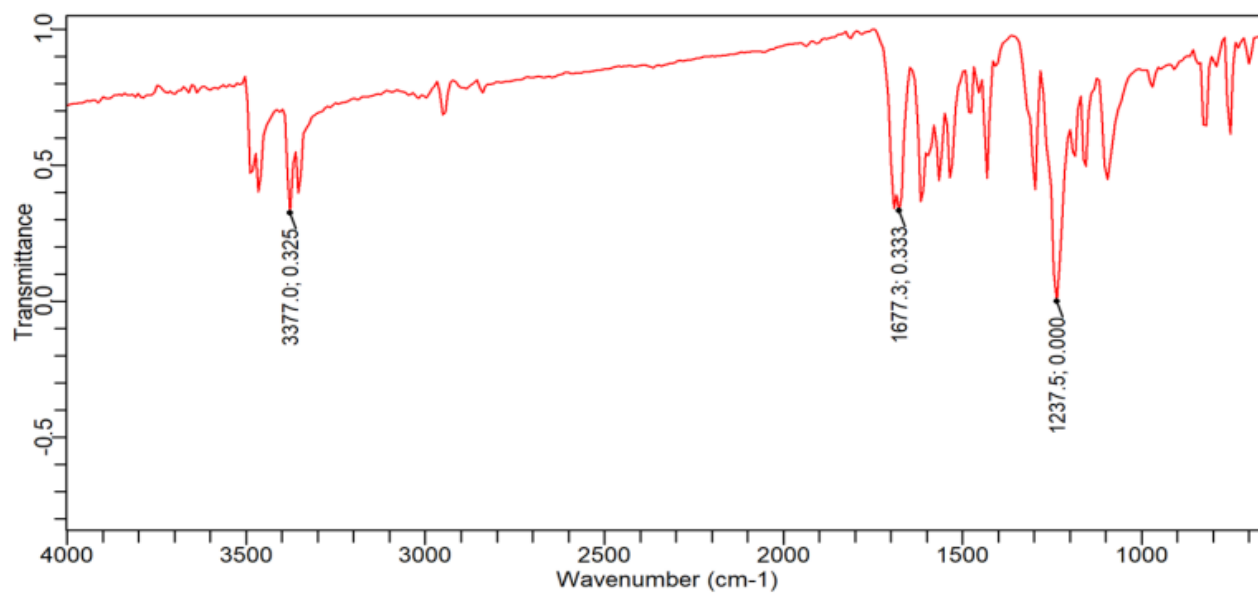

**Figure S20.** FTIR(KBr) spectrum for compound **11**.

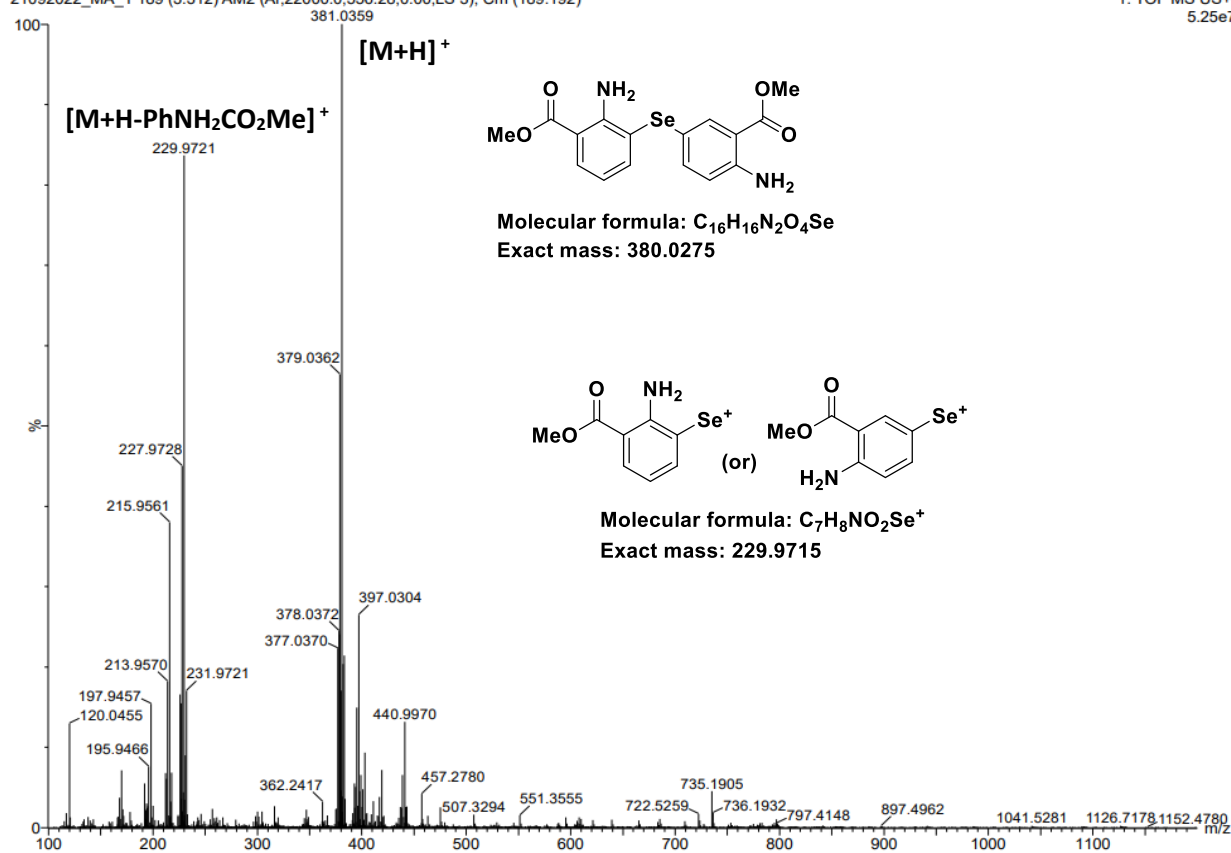

**Figure S21.** HRMS–ESI spectrum for compound **11**.



EXT-VIT-APU-SV-MA-1(500MHz).1.fid  
EXT-VIT-APU-SV-MA-1(500MHz)  
PROTON CDCl3 {/opt/topspin/Ext Samples} nmrsu 3

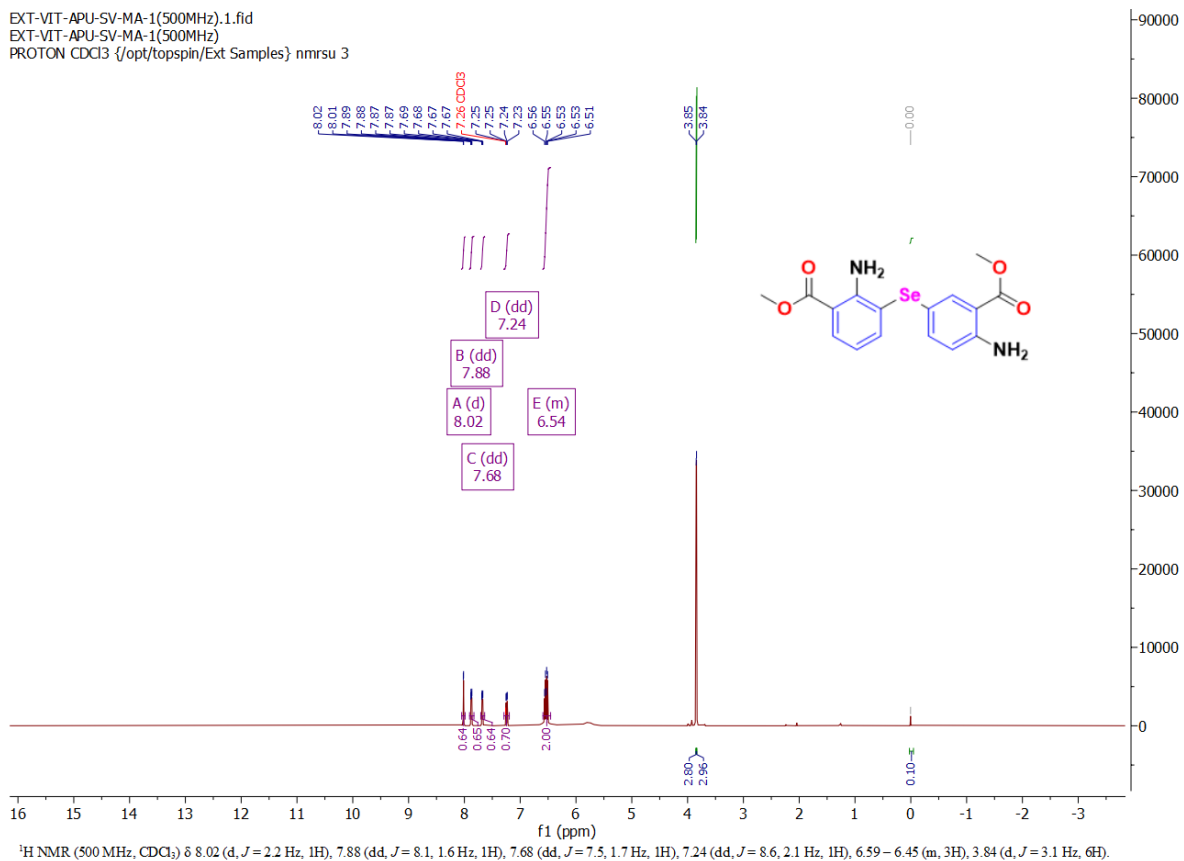

**Figure S22.** <sup>1</sup>H NMR spectral studies for compound 11.

EXT-VIT-APU-SV-MA-1(500MHz).2.fid  
EXT-VIT-APU-SV-MA-1(500MHz)  
C13CPD CDCl3 {/opt/topspin/Ext Samples} nmrsu 3

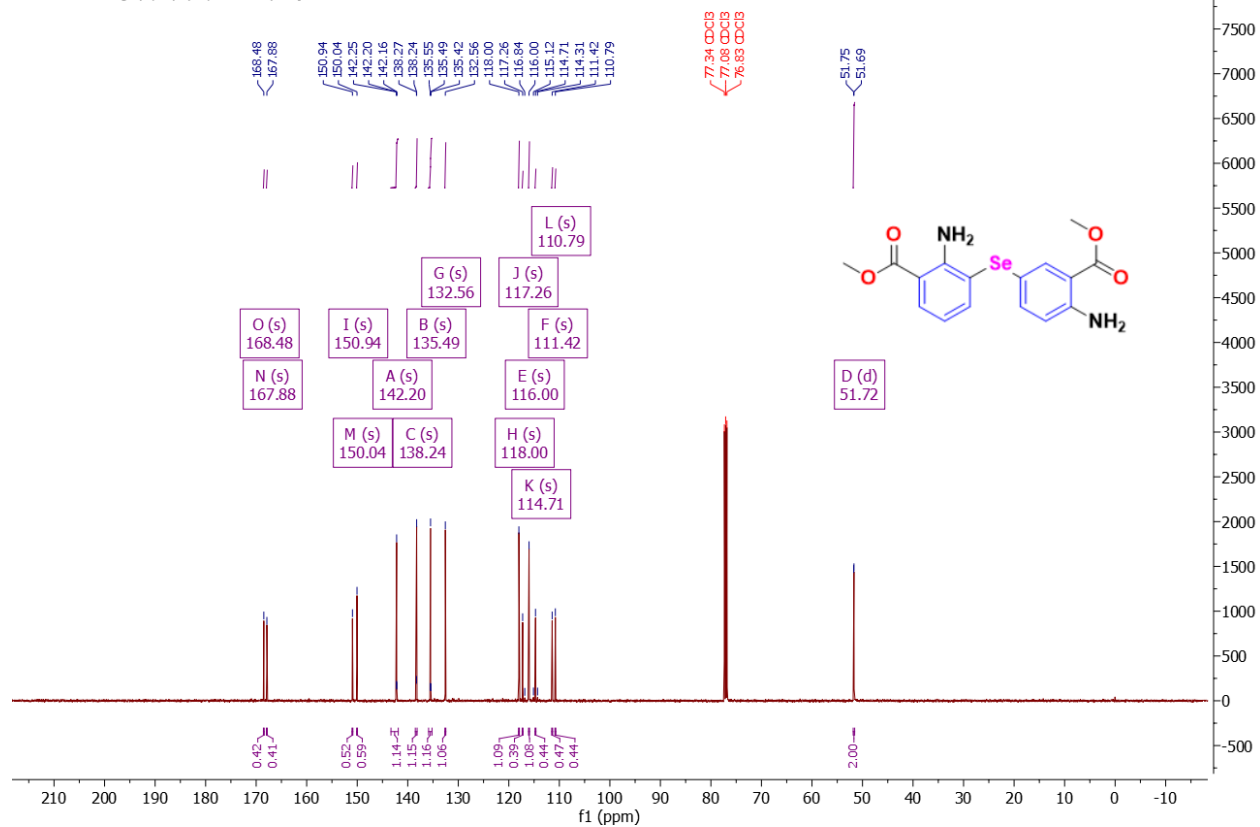

Figure S23.  $^{13}\text{C}$  NMR spectral studies for compound 11.

EXT-VIT-APU-SV-MA-1(500MHz).3.fid  
EXT-VIT-APU-SV-MA-1(500MHz)  
SE77ZG CDCl3 {/opt/topspin/Ext Samples} nmrsu 3

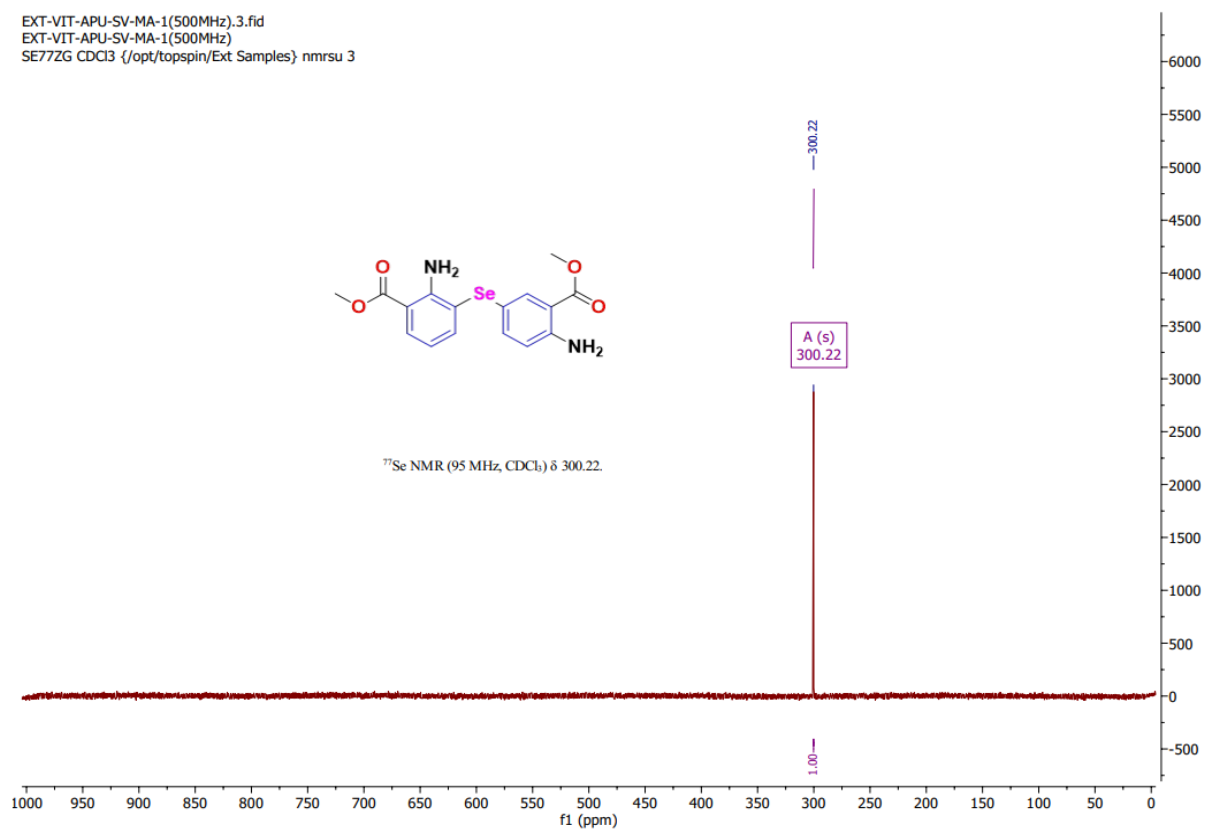

**Figure S24.**  $^{77}\text{Se}$  NMR spectral studies for compound **11**.

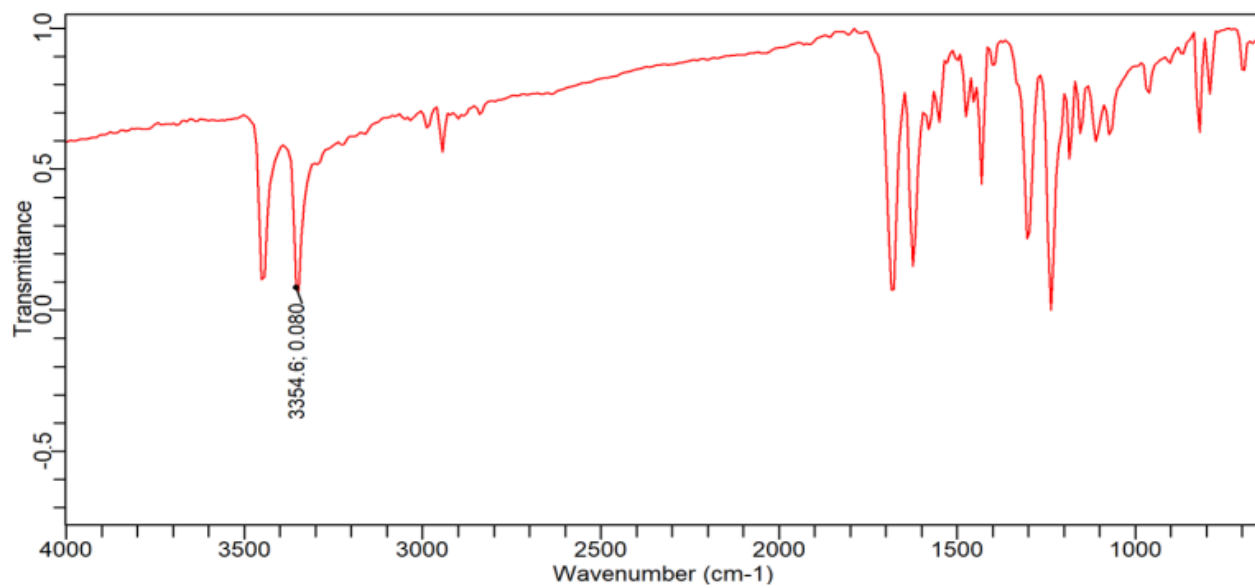

**Figure S25.** FTIR(KBr) spectrum for compound **12**.

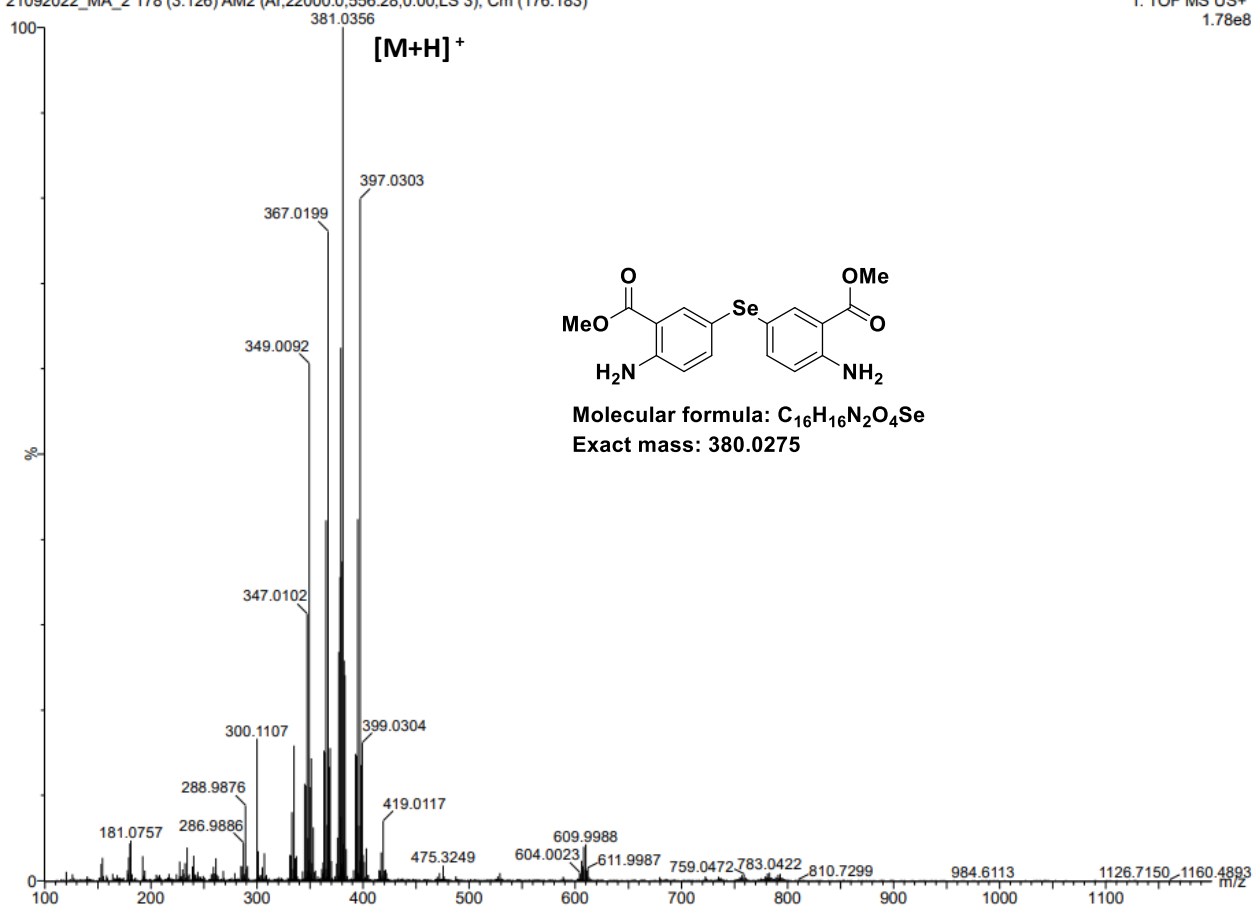

**Figure S26.** HRMS-ESI spectrum for compound **12**.

EXT-VIT-APU-SV-MA-2(500MHz).1.fid  
EXT-VIT-APU-SV-MA-2(500MHz)  
PROTON CDCl3 {/opt/topspin/Ext Samples} nmrsu 4

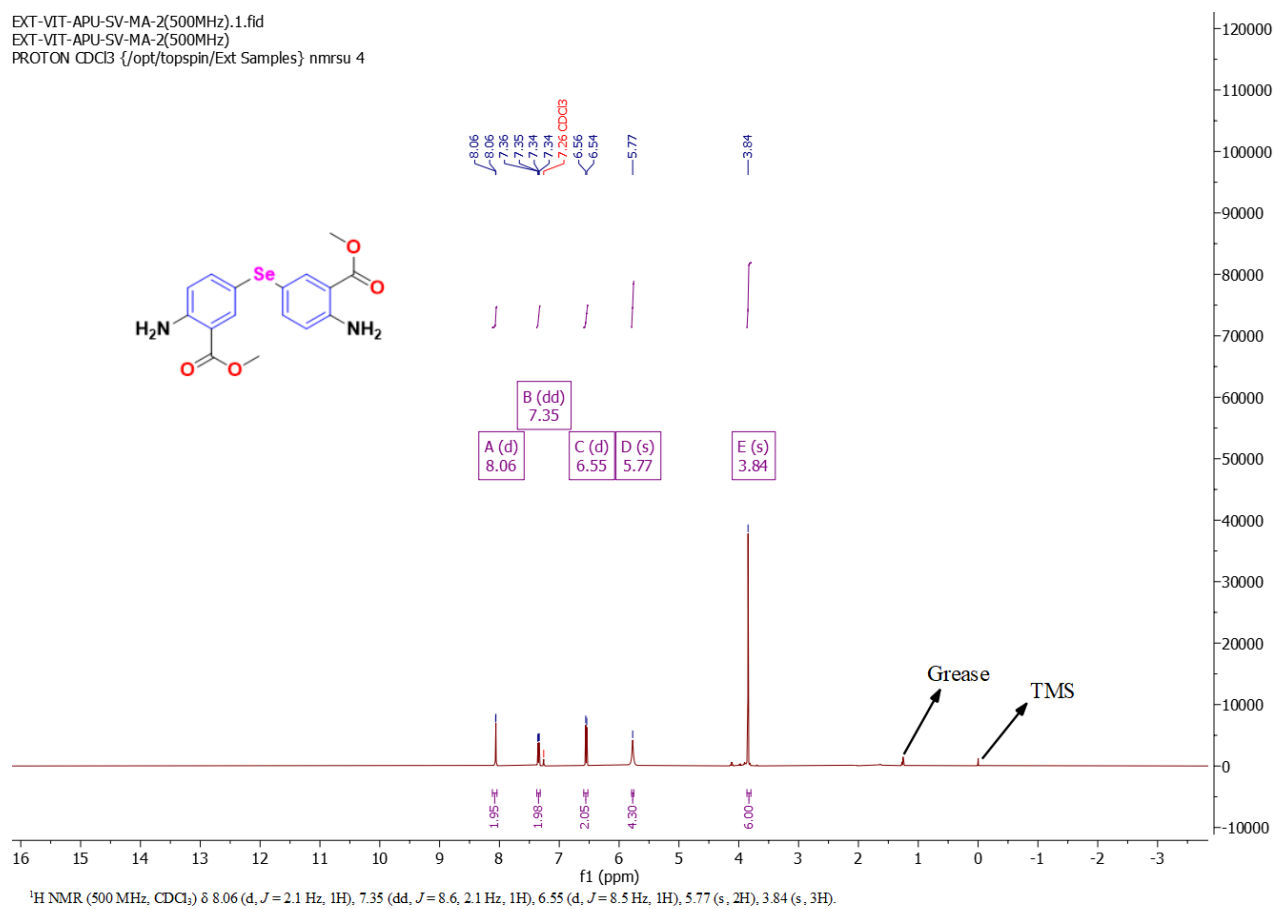

**Figure S27.** <sup>1</sup>H NMR spectral studies for compound **12**.

EXT-VIT-APU-SV-MA-2(500MHz).2.fid  
EXT-VIT-APU-SV-MA-2(500MHz)  
C13CPD CDCl3 {/opt/topspin/Ext Samples} nmr su 4

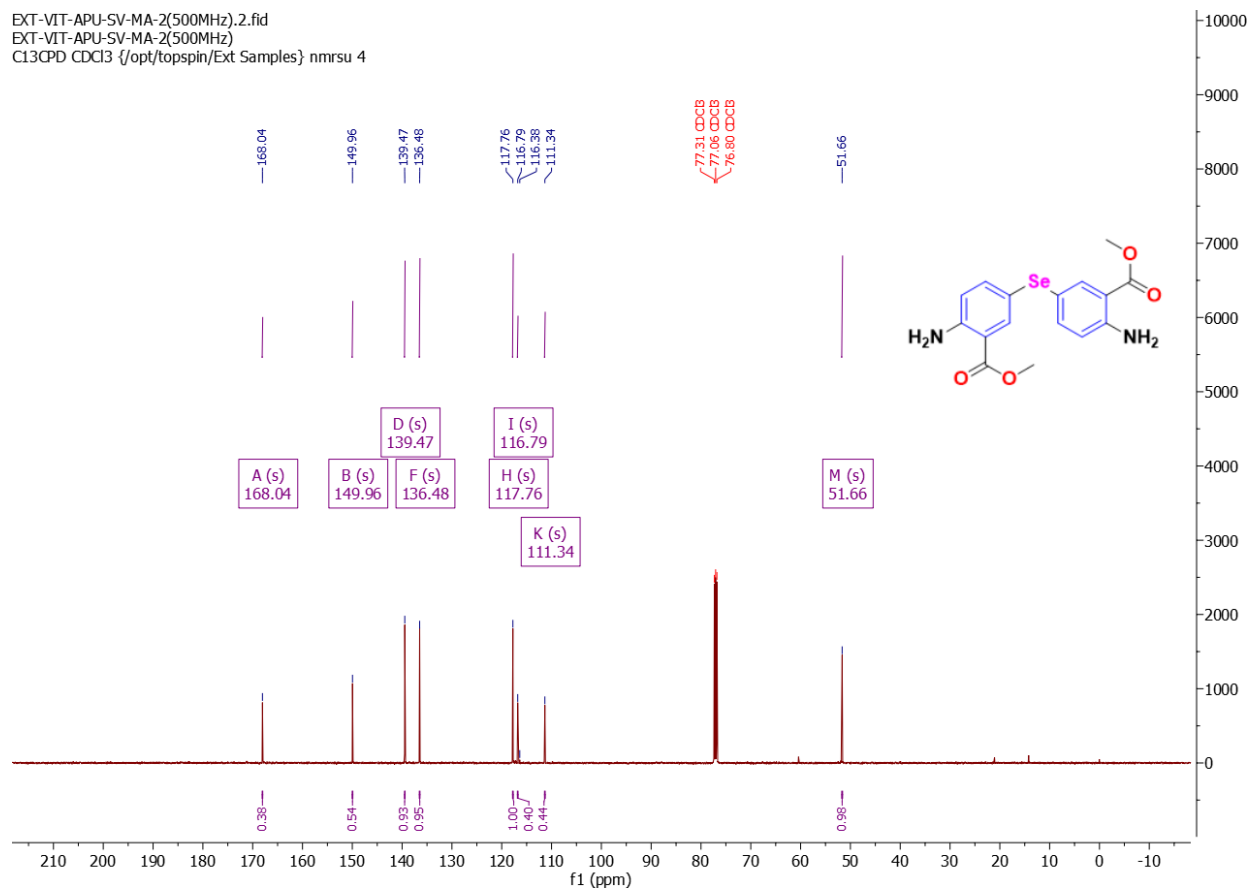

**Figure S28.** <sup>13</sup>C NMR spectral studies for compound 12.

EXT-VIT-APU-SV-MA-2(500MHz).3.fid  
EXT-VIT-APU-SV-MA-2(500MHz)  
SE77ZG CDCl3 {/opt/topspin/Ext Samples} nmr su 4

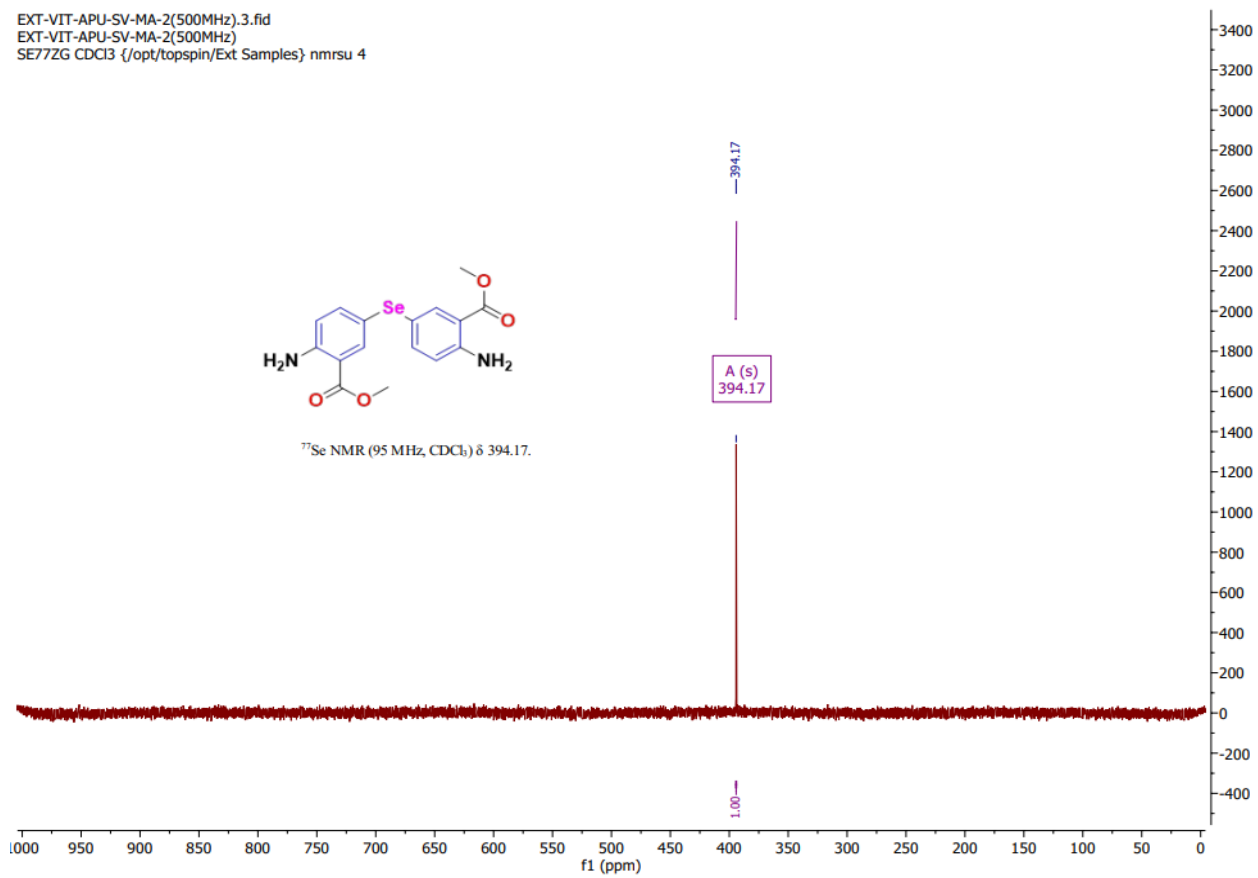

**Figure S29.**  $^{77}\text{Se}$  NMR spectral studies for compound **12**.



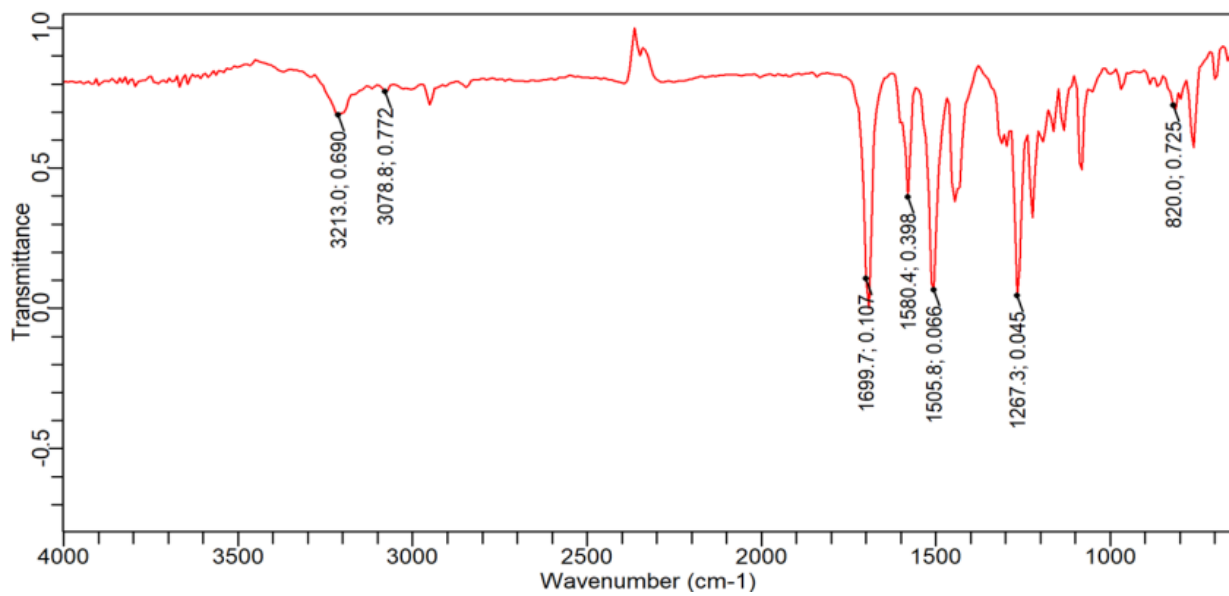

**Figure S30.** FTIR(KBr) spectrum for compound **13**.

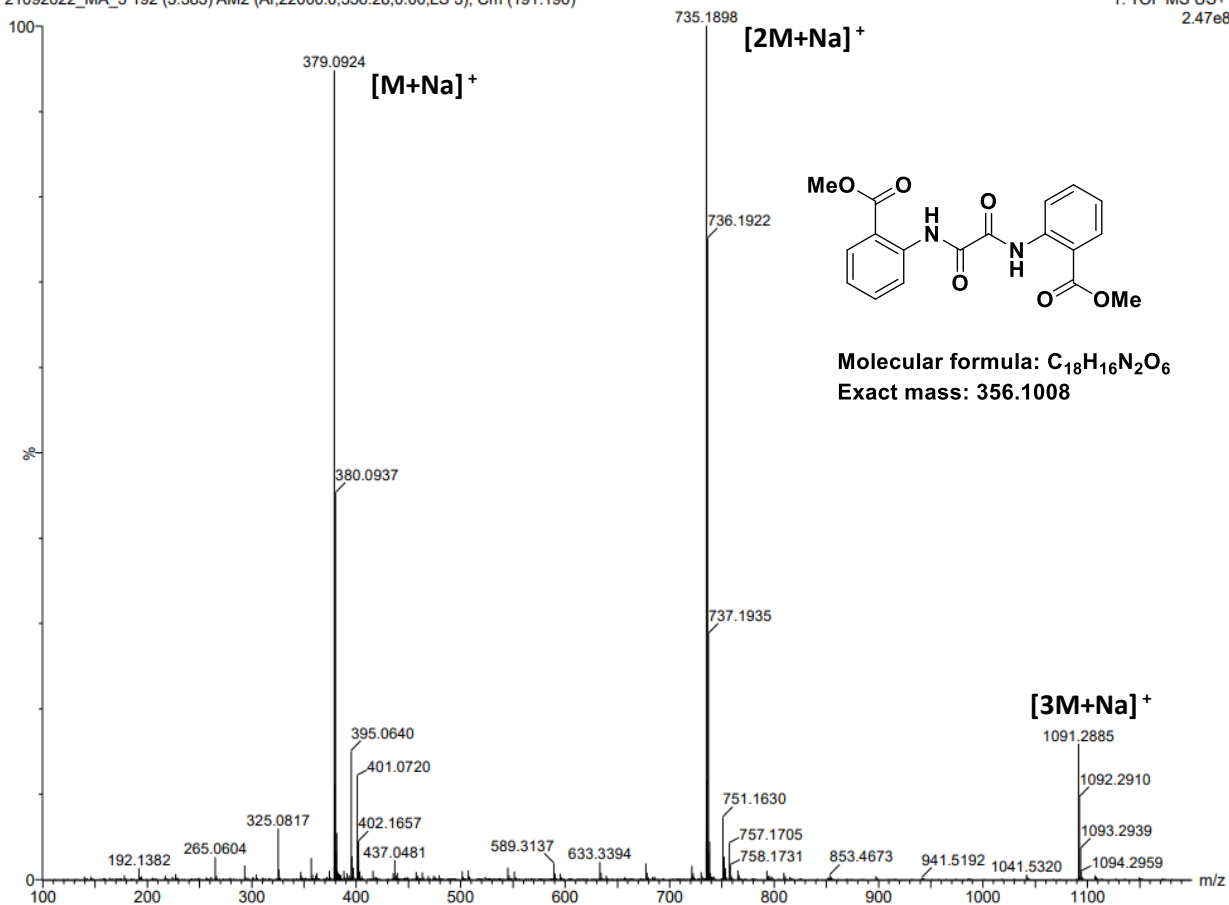

**Figure S31.** HRMS-ESI spectrum for compound 13.

EXT-VITAP-SV-MA-3(500MHz).1.fid  
EXT-VITAP-SV-MA-3(500MHz)  
PROTON CDCl3 {/opt/topspin/Ext Samples} nmrsu 10

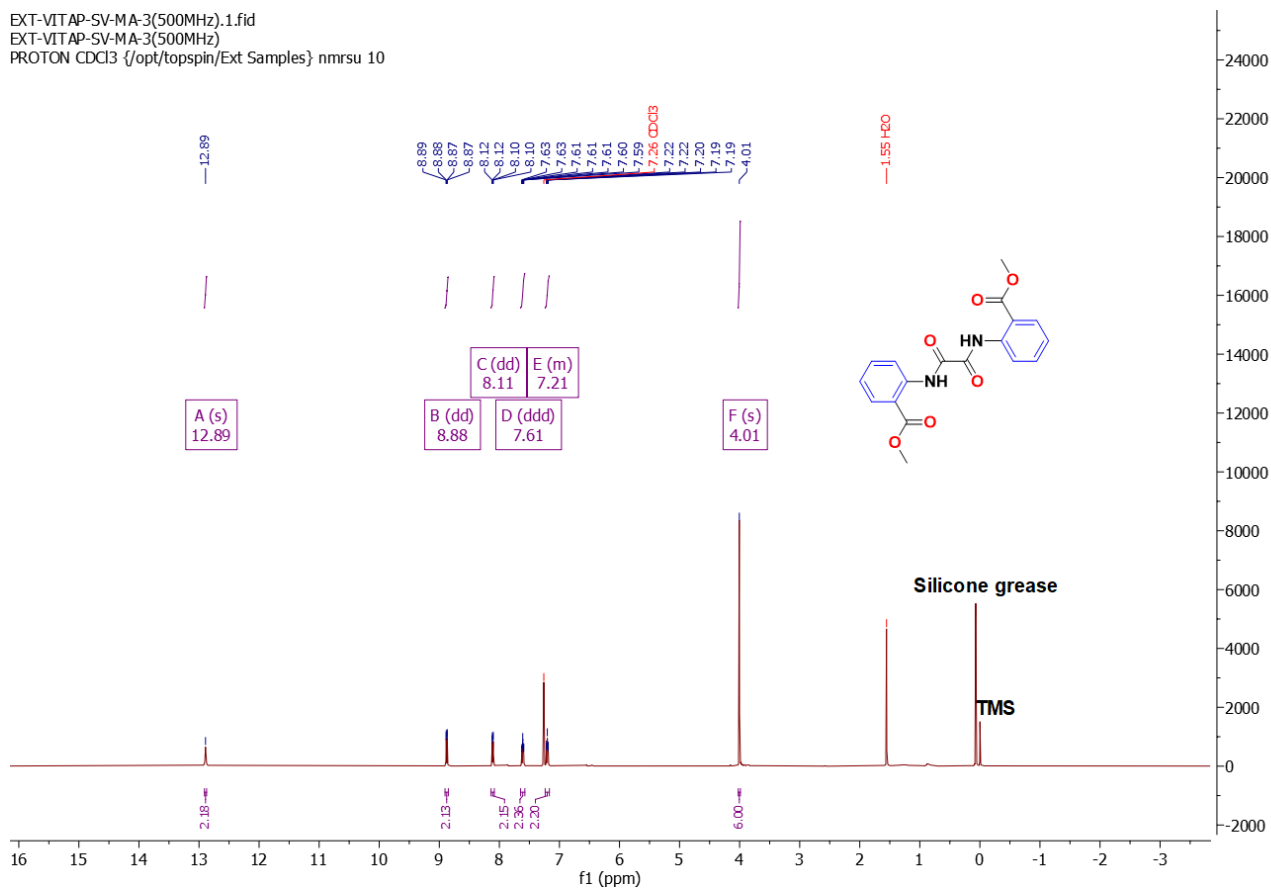

**Figure S32.** <sup>1</sup>H NMR spectral studies for compound **13**.

EXT-VITAP-SV-MA-3(500MHz).2.fid  
EXT-VITAP-SV-MA-3(500MHz)  
C13CPD CDCl3 {/opt/topspin/Ext Samples} nmrsu 10

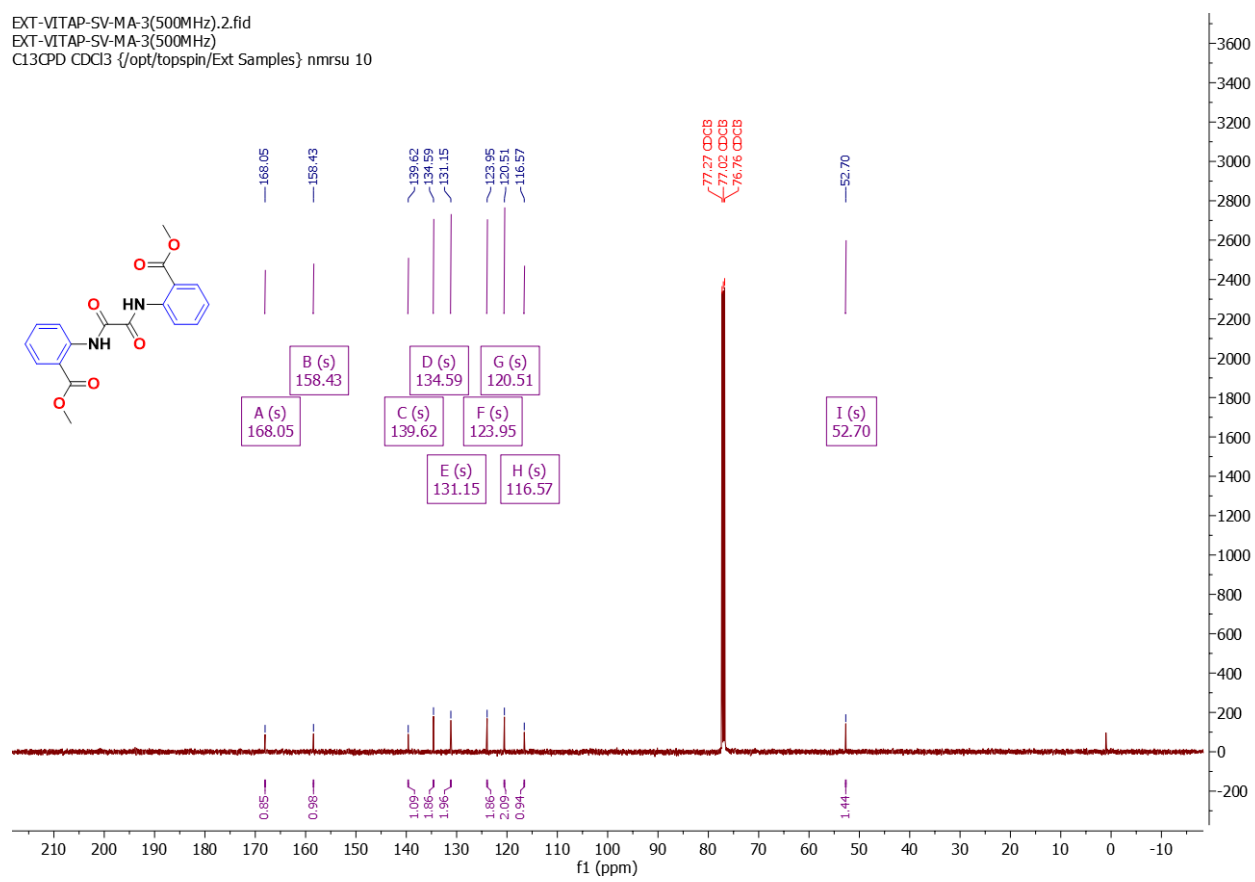

**Figure S33.**  $^{13}\text{C}$  NMR spectral studies for compound **13**.

5. Relative color change upon addition of  $\text{SeO}_2$  to arylamines in acetonitrile

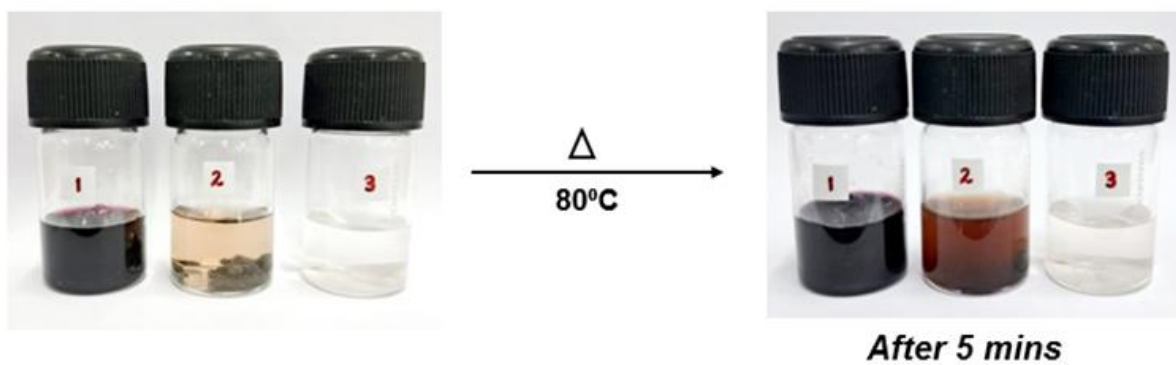

**Figure S34:** Relative color change upon addition of  $\text{SeO}_2$  to arylamines in acetonitrile: vial 1: *o*-anisidine, vial 2: aniline, vial 3: methyl anthranilate.

6. Packing arrangement for compounds 3 and 9

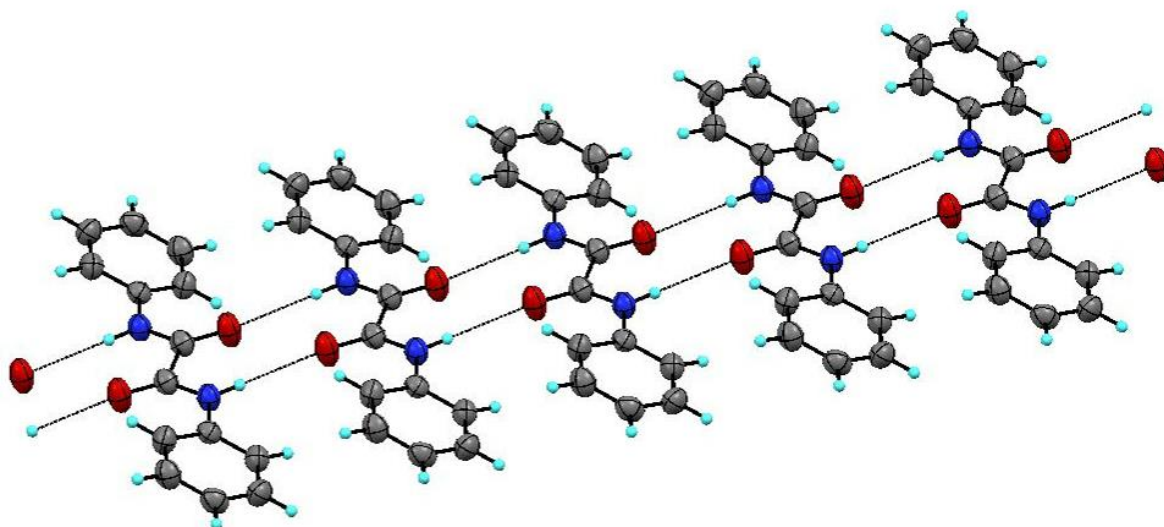

Figure S35. Packing arrangement for compound 3.

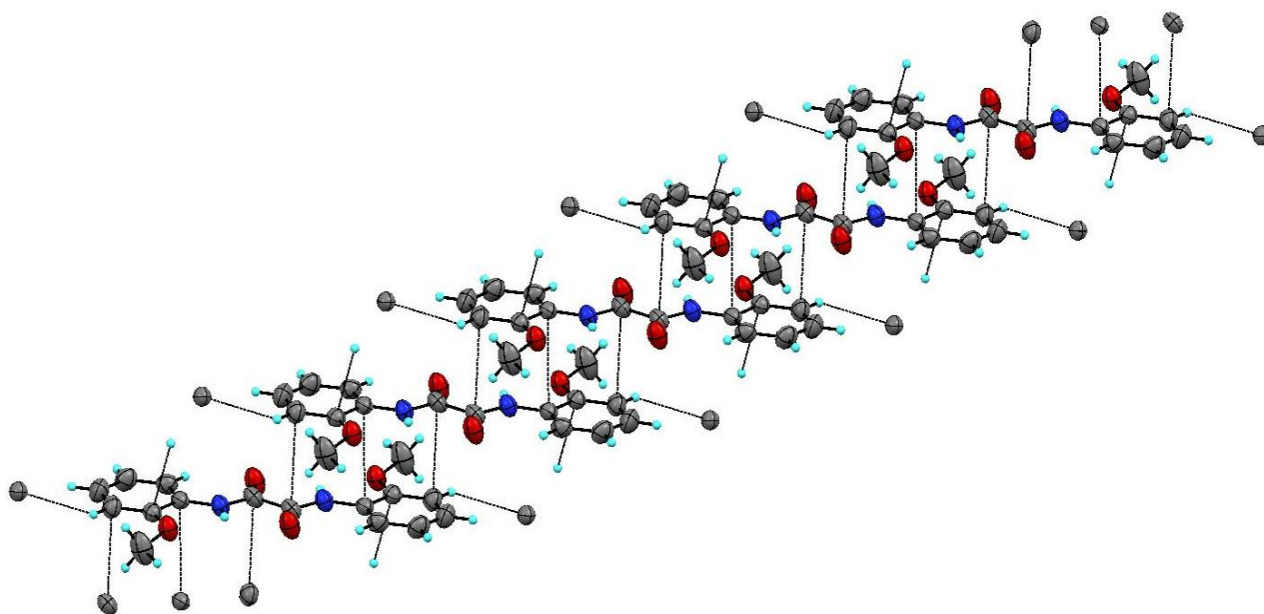

Figure S36. Packing arrangement for compound 9.

## 7. Packing arrangement for compounds 13 and 10

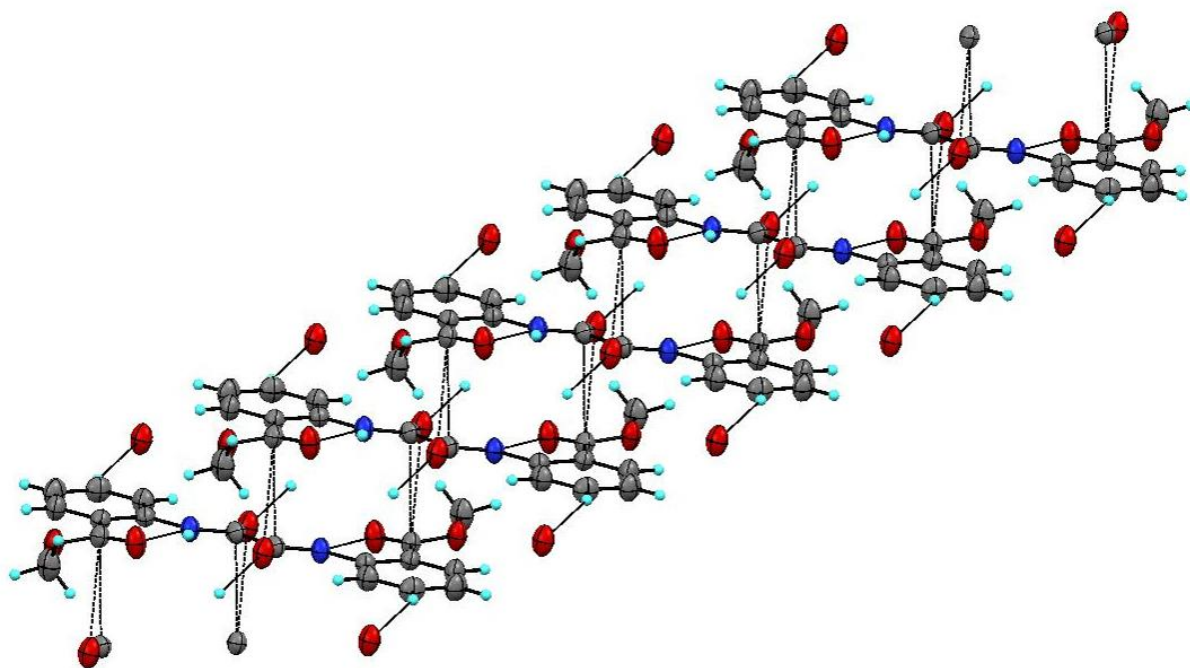

**Figure S37.** Packing arrangement for compound **13**.

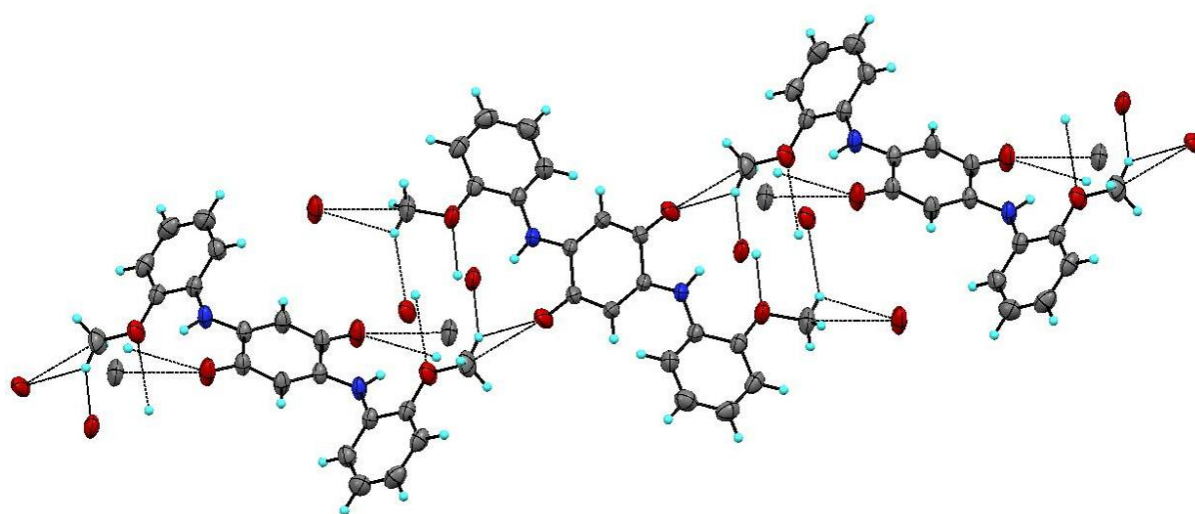

**Figure S38.** Packing arrangement for compound **10**.

## 8. Packing arrangement for compound 11

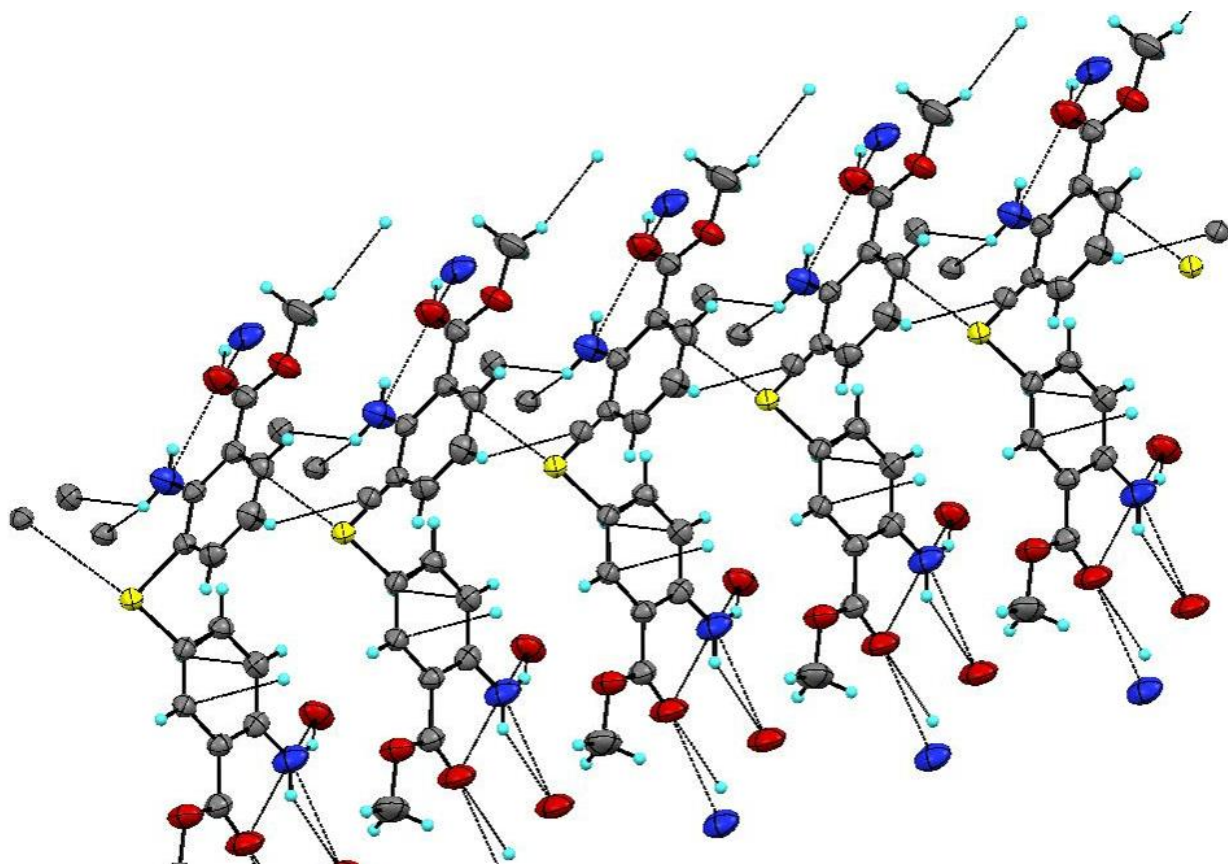

**Figure S39.** Packing arrangement for compound 11.



## 9. Packing arrangement for compound 12

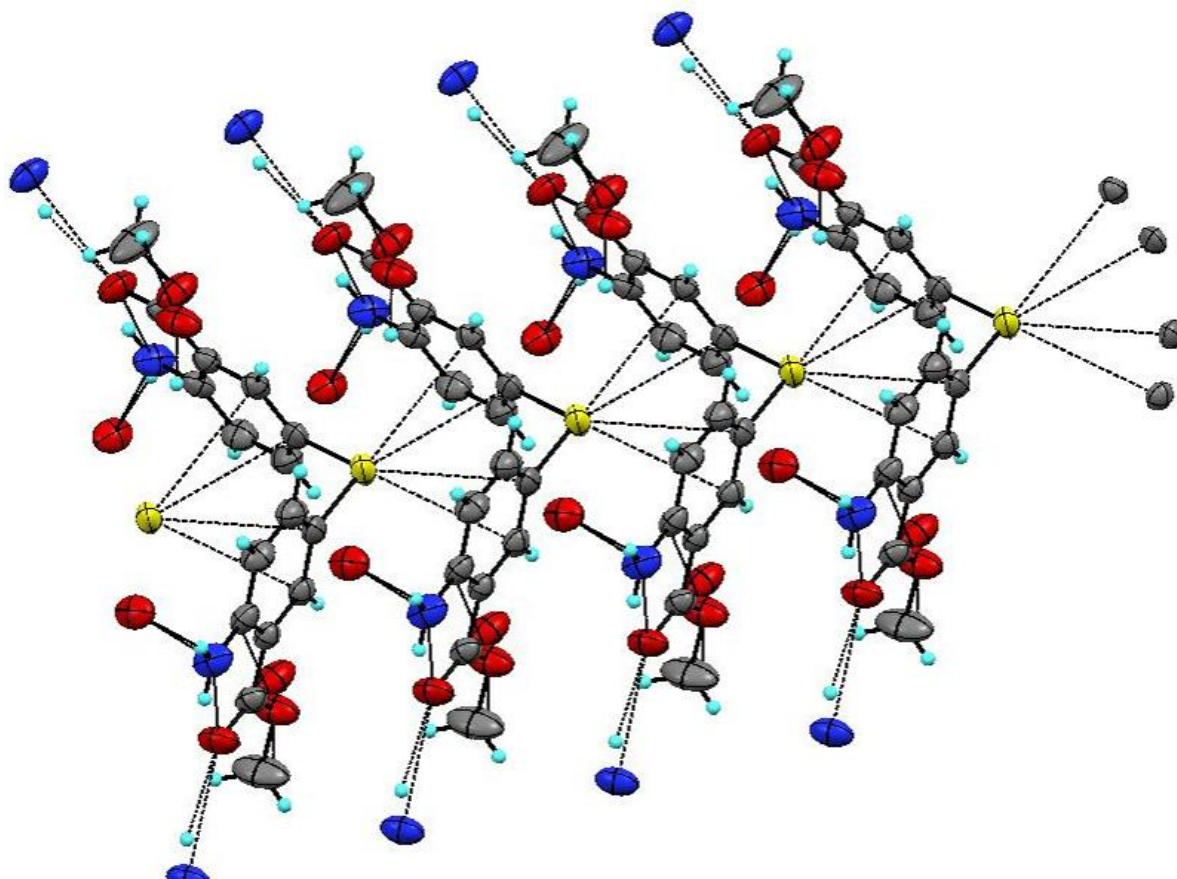

**Figure S40.** Packing arrangement for compound 12.

### 10. HOMO and LUMO energy values for reactants

| reactant            | HOMO (donor)<br>kJ/mol                                                                           | LUMO (acceptor)<br>kJ/mol                                                                         |
|---------------------|--------------------------------------------------------------------------------------------------|---------------------------------------------------------------------------------------------------|
| <i>o</i> -anisidine | -517.9324<br>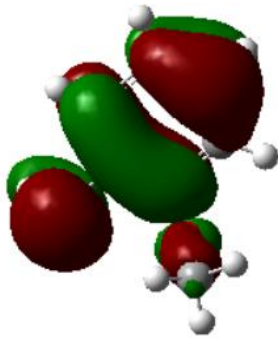   | 24.2334<br>    |
| aniline             | -520.4003<br>  | 22.3955<br>   |
| methyl anthranilate | -526.2552<br> | -91.9450<br> |

|                  |                                                                                   |                                                                                    |
|------------------|-----------------------------------------------------------------------------------|------------------------------------------------------------------------------------|
| Selenium dioxide | -820.8101                                                                         | -394.4289                                                                          |
|                  | 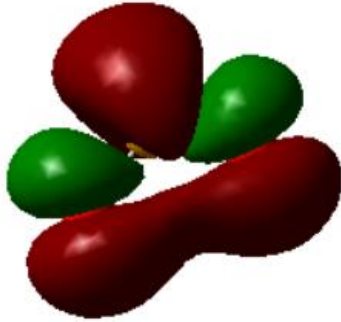 |  |

**Figure S41:** HOMO and LUMO energy values for reactants.
